# Supplementary material for: Provenance Analysis and Structural Study of the Cycladic Blueschist Unit Rocks from Iraklia Island: From the Paleozoic Basement Unroofing to the Cenozoic Exhumation
Source: Preprints.org preprint supplement (doi:10.20944/preprints202111.0477.v1), 2021-11-25
Supplement: Supplementary file 1 [file supplementary]

## Sheet: Sheet1
	Sample Name:								207/235		206/238		207/206		Best age
Sample ID	Sample_ID	[U] ppm	U/Th	207/235	2σ error	206/238	2σ error	RHO	Age Ma	2σ error	Age (Ma)	2σ error	Age (Ma)	2σ error	(Ma)	2σ error	Th/U
IRA1503	IRA1503_76.FIN2	364	1.86	0.435	0.026	0.053	0.0024	0.82468	365	18	333	15	592	78	333	15	0.537634
IRA1503	IRA1503_106.FIN2	490	0.624	0.7378	0.008	0.08997	0.00071	0.33489	561.3	4.7	555.3	4.2	584	26	555.3	4.2	1.60256
IRA1503	IRA1503_119.FIN2	295.4	0.5125	0.759	0.012	0.0913	0.00069	0.25195	573	6.8	563.2	4	1999	33	563.2	4	1.95122
IRA1503	IRA1503_68.FIN2	238	1.464	0.762	0.014	0.0921	0.0011	0.4409	574.3	8.1	567.7	6.5	599	36	567.7	6.5	0.68306
IRA1503	IRA1503_89.FIN2	336	0.643	0.798	0.017	0.0955	0.0013	0.41419	594.3	9.5	587.7	7.6	618	40	587.7	7.6	1.55521
IRA1503	IRA1503_114.FIN2	195	0.292	0.782	0.018	0.0955	0.0012	0.012496	586	10	587.8	7.2	569	56	587.8	7.2	3.42466
IRA1503	IRA1503_59.FIN2	280	0.875	0.796	0.012	0.0964	0.0011	0.41738	594.5	6.5	593.2	6.2	582	32	593.2	6.2	1.14286
IRA1503	IRA1503_81.FIN2	86.3	0.665	0.791	0.021	0.0982	0.0012	0.14376	595	12	603.8	6.9	560	62	603.8	6.9	1.50376
IRA1503	IRA1503_17.FIN2	173.3	1.172	0.843	0.015	0.10137	0.00097	0.17151	621.2	8.2	623.5	5.7	597	37	623.5	5.7	0.853242
IRA1503	IRA1503_58.FIN2	1590	1.034	0.852	0.014	0.1017	0.0017	0.054391	625.4	7.9	624.3	9.8	595	31	624.3	9.8	0.967118
IRA1503	IRA1503_94.FIN2	148	1.34	0.864	0.02	0.1017	0.0015	0.31631	634	11	625.4	9.1	654	49	625.4	9.1	0.746269
IRA1503	IRA1503_78.FIN2	102.2	2.3	0.897	0.036	0.1027	0.0026	0.049392	649	19	630	15	731	96	630	15	0.434783
IRA1503	IRA1503_20.FIN2	88.4	0.702	0.873	0.021	0.1042	0.0013	0.25692	638	12	638.8	7.5	639	47	638.8	7.5	1.4245
IRA1503	IRA1503_24.FIN2	418	1.182	0.87	0.014	0.1042	0.0011	0.65647	635	7.8	639.7	6.3	620	26	639.7	6.3	0.846024
IRA1503	IRA1503_69.FIN2	141.3	1.256	0.876	0.017	0.1051	0.0011	0.27081	639.6	8.8	644	6.5	623	35	644	6.5	0.796178
IRA1503	IRA1503_113.FIN2	466	0.496	1.002	0.021	0.1115	0.0019	0.85239	704	10	682	11	785	37	682	11	2.01613
IRA1503	IRA1503_82.FIN2	108.9	1.114	1.039	0.03	0.1128	0.002	0.53161	723	14	689	12	845	50	689	12	0.897666
IRA1503	IRA1503_73.FIN2	204	1.58	1.013	0.028	0.1133	0.0023	0.63584	708	14	692	14	774	46	692	14	0.632911
IRA1503	IRA1503_110.FIN2	227	1.25	0.997	0.015	0.1152	0.0011	0.17652	701.5	7.6	702.9	6.2	705	33	702.9	6.2	0.8
IRA1503	IRA1503_46.FIN2	88.9	0.602	1	0.023	0.1157	0.0017	0.4769	703	12	706	10	682	43	706	10	1.66113
IRA1503	IRA1503_120.FIN2	98.8	0.714	1.04	0.029	0.119	0.0017	0.38434	724	15	724.4	9.6	594	57	724.4	9.6	1.40056
IRA1503	IRA1503_8.FIN2	67.6	1.314	1.147	0.039	0.1218	0.0022	0.30744	776	18	741	12	870	67	741	12	0.761035
IRA1503	IRA1503_25.FIN2	50.6	1.209	1.131	0.04	0.1221	0.0023	0.11621	769	18	742	13	833	82	742	13	0.82713
IRA1503	IRA1503_16.FIN2	564	2.132	1.138	0.014	0.1266	0.0011	0.72557	771.4	6.4	768.6	6.3	782	20	768.6	6.3	0.469043
IRA1503	IRA1503_101.FIN2	76	0.5174	1.185	0.036	0.1281	0.002	0.41856	794	16	777	11	832	57	777	11	1.93274
IRA1503	IRA1503_38.FIN2	196.8	0.765	1.167	0.019	0.1283	0.0014	0.51246	784.4	8.8	778.1	8.2	798	29	778.1	8.2	1.30719
IRA1503	IRA1503_49.FIN2	110.9	0.911	1.158	0.032	0.1289	0.0017	0.27973	781	15	783	9.3	749	59	783	9.3	1.09769
IRA1503	IRA1503_56.FIN2	168	0.919	1.182	0.024	0.1295	0.0015	0.43321	792	11	785.1	8.5	803	40	785.1	8.5	1.08814
IRA1503	IRA1503_92.FIN2	271	0.9003	1.191	0.02	0.1297	0.0013	0.6245	795.6	9.3	786.2	7.6	805	30	786.2	7.6	1.11074
IRA1503	IRA1503_47.FIN2	311	1.02	1.198	0.021	0.1306	0.0014	0.32383	799.1	9.6	791.2	8.2	807	36	791.2	8.2	0.980392
IRA1503	IRA1503_71.FIN2	85.5	1.158	1.224	0.024	0.1312	0.0016	0.12852	810	11	794.6	9.2	874	46	794.6	9.2	0.863558
IRA1503	IRA1503_61.FIN2	104.3	0.616	1.227	0.024	0.1318	0.0014	0.36326	811	11	797.7	8.1	841	39	797.7	8.1	1.62338
IRA1503	IRA1503_53.FIN2	174.6	0.465	1.249	0.023	0.1327	0.0017	0.24092	821	10	804.1	9.8	837	39	804.1	9.8	2.15054
IRA1503	IRA1503_10.FIN2	193	1.319	1.226	0.018	0.1329	0.0013	0.26239	812.7	8	804.3	7.4	847	32	804.3	7.4	0.75815
IRA1503	IRA1503_12.FIN2	405	1.632	1.226	0.015	0.13302	0.00095	0.68859	811.8	6.8	805	5.4	837	22	805	5.4	0.612745
IRA1503	IRA1503_90.FIN2	129.4	1.219	1.219	0.03	0.1331	0.0016	0.2895	809	14	805.5	9.1	797	46	805.5	9.1	0.820345
IRA1503	IRA1503_50.FIN2	221.5	0.962	1.216	0.019	0.1333	0.0017	0.44719	806.9	8.5	808	10	799	30	808	10	1.0395
IRA1503	IRA1503_44.FIN2	345	1.097	1.22	0.019	0.1335	0.0013	0.3788	808.9	8.4	808.4	7.4	810	36	808.4	7.4	0.911577
IRA1503	IRA1503_67.FIN2	241.6	1.577	1.206	0.016	0.1341	0.0012	0.18648	803.6	7.4	811	6.8	776	32	811	6.8	0.634115
IRA1503	IRA1503_45.FIN2	494	0.768	1.217	0.014	0.13415	0.00098	0.37697	808.5	6.2	812.1	5.7	799	22	812.1	5.7	1.30208
IRA1503	IRA1503_43.FIN2	656	1.184	1.225	0.012	0.1348	0.001	0.44924	811.7	5.6	815.2	5.7	791	19	815.2	5.7	0.844595
IRA1503	IRA1503_33.FIN2	163	0.748	1.23	0.021	0.1353	0.0013	0.17941	813.5	9.7	817.8	7.3	809	40	817.8	7.3	1.3369
IRA1503	IRA1503_91.FIN2	905	1.563	1.263	0.012	0.1364	0.001	0.5395	829.1	5.3	824.2	5.7	833	16	824.2	5.7	0.639795
IRA1503	IRA1503_87.FIN2	120.8	0.682	1.237	0.027	0.1371	0.0013	0.11002	816	12	828.1	7.3	783	43	828.1	7.3	1.46628
IRA1503	IRA1503_105.FIN2	335	1.07	1.343	0.021	0.1387	0.0017	0.57875	863.7	9.1	838	10	945	27	838	10	0.934579
IRA1503	IRA1503_54.FIN2	276	0.969	1.304	0.017	0.14	0.0012	0.29618	846.6	7.7	844.4	6.5	817	29	844.4	6.5	1.03199
IRA1503	IRA1503_99.FIN2	140	1.302	1.305	0.02	0.14	0.0011	0.084995	848.1	8.4	844.7	6.2	850	35	844.7	6.2	0.768049
IRA1503	IRA1503_3.FIN2	158	2.345	1.431	0.026	0.1524	0.002	0.35439	902	11	914	11	867	38	867	38	0.426439
IRA1503	IRA1503_104.FIN2	143.9	0.715	1.367	0.023	0.1435	0.0012	0.26849	875.6	9.5	864.2	6.5	897	31	897	31	1.3986
IRA1503	IRA1503_21.FIN2	77.6	0.538	1.381	0.03	0.1458	0.0018	0.38691	879	13	877	10	902	45	902	45	1.85874
IRA1503	IRA1503_26.FIN2	176	1.172	1.466	0.021	0.1519	0.0013	0.28275	915.3	8.9	911.6	7.2	916	31	916	31	0.853242
IRA1503	IRA1503_84.FIN2	271	4.823	1.554	0.02	0.161	0.0011	0.34202	952.9	8.2	963.1	6	926	28	926	28	0.20734
IRA1503	IRA1503_40.FIN2	453	5.9	1.71	0.02	0.1735	0.0016	0.39105	1011.6	7.7	1031	9	968	23	968	23	0.169492
IRA1503	IRA1503_34.FIN2	339	0.97	1.596	0.026	0.1622	0.0018	0.66794	969.3	9.9	969	10	970	26	970	26	1.03093
IRA1503	IRA1503_57.FIN2	332.2	3.561	1.647	0.021	0.1645	0.0013	0.38496	989.6	8.2	981.7	7.1	976	26	976	26	0.28082
IRA1503	IRA1503_31.FIN2	287.1	1.84	1.685	0.019	0.1688	0.0014	0.53223	1002.3	7.2	1005.4	7.8	983	21	983	21	0.543478
IRA1503	IRA1503_30.FIN2	387	1.029	1.76	0.019	0.1742	0.0015	0.4226	1030.5	6.9	1035.3	8.5	1019	23	1019	23	0.971817
IRA1503	IRA1503_1.FIN2	71.4	0.836	1.786	0.036	0.1734	0.0024	0.40497	1040	13	1031	13	1069	35	1069	35	1.19617
IRA1503	IRA1503_65.FIN2	251	0.937	2.682	0.053	0.2119	0.0031	0.60218	1324	14	1239	17	1466	30	1466	30	1.06724
IRA1503	IRA1503_62.FIN2	42.41	1.325	2.691	0.081	0.2113	0.0041	0.27357	1333	22	1235	22	1510	62	1510	62	0.754717
IRA1503	IRA1503_19.FIN2	235	5.79	5.371	0.038	0.346	0.0023	0.53112	1879.8	6	1916	11	1837	13	1837	13	0.172712
IRA1503	IRA1503_79.FIN2	552	6.03	5.25	0.047	0.3356	0.0029	0.60773	1860.5	7.6	1865	14	1858	15	1858	15	0.165837
IRA1503	IRA1503_4.FIN2	346	3.108	5.008	0.068	0.3188	0.0046	0.61844	1820	11	1783	22	1874	21	1874	21	0.32175
IRA1503	IRA1503_22.FIN2	245.3	5.82	5.734	0.059	0.3588	0.0029	0.54854	1935.8	9	1978	13	1881	18	1881	18	0.171821
IRA1503	IRA1503_112.FIN2	296	5.47	5.463	0.045	0.3465	0.0032	0.54713	1894.2	7.1	1917	15	1882	14	1882	14	0.182815
IRA1503	IRA1503_37.FIN2	493	3.8	5.569	0.042	0.3516	0.0024	0.61868	1912.1	6.6	1943	11	1886	12	1886	12	0.263158
IRA1503	IRA1503_111.FIN2	143.2	4.151	6.166	0.056	0.3711	0.0028	0.53637	1998.8	7.9	2034	13	1972	14	1972	14	0.240906
IRA1503	IRA1503_86.FIN2	128.3	1.503	4.613	0.092	0.2706	0.0032	0.41474	1749	17	1544	16	1986	33	1986	33	0.665336
IRA1503	IRA1503_118.FIN2	244.1	2.15	6.23	0.1	0.3666	0.0044	0.70358	2007	14	2013	21	904	20	1999	20	0.465116
IRA1503	IRA1503_88.FIN2	430	3.43	6.395	0.097	0.3683	0.0039	0.6732	2030	13	2021	18	2038	18	2038	18	0.291545
IRA1503	IRA1503_98.FIN2	74.6	0.5035	6.3	0.11	0.3622	0.005	0.57919	2019	16	1996	24	2048	28	2048	28	1.9861
IRA1503	IRA1503_4.FIN2	596	11.6	6.988	0.092	0.3674	0.0032	0.62124	2114	12	2017	15	2200	19	2200	19	0.0862069
IRA1503	IRA1503_6.FIN2	41.84	1.223	10.13	0.21	0.4666	0.0087	0.74327	2442	19	2470	39	2420	24	2420	24	0.817661
IRA1503	IRA1503_102.FIN2	30	2.13	9.46	0.19	0.435	0.007	0.66823	2389	19	2326	31	2434	25	2434	25	0.469484
IRA1503	IRA1503_60.FIN2	586	2.65	9.686	0.099	0.4411	0.0029	0.58532	2405.2	9.5	2355	13	2434	13	2434	13	0.377358
IRA1503	IRA1503_63.FIN2	130.4	1.157	8.33	0.1	0.3768	0.0038	0.54835	2268	11	2061	18	2445	19	2445	19	0.864304
IRA1503	IRA1503_28.FIN2	281.1	3.856	8.34	0.13	0.376	0.0065	0.8038	2268	14	2057	30	2457	18	2457	18	0.259336
IRA1503	IRA1503_36.FIN2	430	6.23	8.319	0.087	0.374	0.0044	0.50034	2266.1	9.5	2048	21	2469	20	2469	20	0.160514
IRA1503	IRA1503_5.FIN2	89.5	0.794	10.36	0.14	0.4675	0.0047	0.71185	2465	12	2472	20	2469	18	2469	18	1.25945
IRA1503	IRA1503_75.FIN2	119.9	1.856	9.411	0.093	0.4247	0.0039	0.60344	2378.2	9.1	2281	17	2472	16	2472	16	0.538793
IRA1503	IRA1503_13.FIN2	226	1.87	9.157	0.096	0.4087	0.0036	0.71719	2354.4	9.3	2211	16	2479	13	2479	13	0.534759
IRA1503	IRA1503_51.FIN2	135.7	0.6081	10.881	0.085	0.4815	0.0036	0.59952	2512.3	7.3	2533	16	2480	12	2480	12	1.64447
IRA1503	IRA1503_39.FIN2	627.5	1.304	9.94	0.11	0.4453	0.0046	0.58167	2430.5	9.4	2374	20	2481	15	2481	15	0.766871
IRA1503	IRA1503_96.FIN2	23.03	8.4	10.47	0.35	0.466	0.016	0.77819	2475	30	2459	71	2483	41	2483	41	0.119048
IRA1503	IRA1503_41.FIN2	159.1	0.714	9.7	0.12	0.4331	0.0045	0.34635	2405	11	2319	20	2484	16	2484	16	1.40056
IRA1503	IRA1503_83.FIN2	278	3.64	9.29	0.15	0.4106	0.0048	0.75039	2366	15	2217	22	2496	17	2496	17	0.274725
IRA1503	IRA1503_48.FIN2	684	7.21	10.15	0.11	0.4442	0.005	0.77091	2448	10	2369	22	2498	15	2498	15	0.138696
IRA1503	IRA1503_70.FIN2	311.4	0.992	10.372	0.078	0.457	0.0042	0.59252	2469.6	7.4	2426	19	2511	13	2511	13	1.00806
IRA1503	IRA1503_27.FIN2	285	4.25	10.86	0.12	0.4729	0.0046	0.79467	2511	10	2496	20	2515	12	2515	12	0.235294
IRA1503	IRA1503_77.FIN2	1262	9.2	9.84	0.07	0.4292	0.0031	0.5643	2419.7	6.6	2302	14	2520	12	2520	12	0.108696
IRA1503	IRA1503_7.FIN2	100.8	0.74	11.43	0.12	0.497	0.0046	0.22348	2557.6	9.6	2600	20	2523	15	2523	15	1.35135
IRA1503	IRA1503_85.FIN2	64.3	0.516	11.15	0.11	0.4798	0.0045	0.62098	2535.7	9.6	2526	20	2530	15	2530	15	1.93798
IRA1503	IRA1503_55.FIN2	541	1.123	10.776	0.068	0.4641	0.0032	0.53944	2503.6	5.9	2457	14	2531	11	2531	11	0.890472
IRA1503	IRA1503_29.FIN2	858	16.99	11.204	0.08	0.4853	0.0043	0.72478	2540.5	6.7	2552	19	2533.7	9.8	2533.7	9.8	0.0588582
IRA1503	IRA1503_80.FIN2	220	1.98	11.15	0.17	0.4819	0.0064	0.77491	2533	14	2534	28	2534	17	2534	17	0.505051
IRA1503	IRA1503_66.FIN2	280.6	2.55	11.349	0.081	0.4887	0.0035	0.66726	2551.6	6.7	2565	15	2535	10	2535	10	0.392157
IRA1503	IRA1503_15.FIN2	529	1.153	11.703	0.081	0.5069	0.0041	0.81404	2581.1	6.4	2643	17	2538.5	8.9	2538.5	8.9	0.867303
IRA1503	IRA1503_100.FIN2	72.8	0.769	11.06	0.13	0.4798	0.0047	0.60234	2530	11	2525	21	2539	15	2539	15	1.30039
IRA1503	IRA1503_107.FIN2	141.6	0.792	10.98	0.11	0.4733	0.005	0.59823	2522.9	9.7	2497	22	2540	15	2540	15	1.26263
IRA1503	IRA1503_23.FIN2	152.5	1.379	11.78	0.1	0.5075	0.004	0.65915	2588.8	8.1	2646	17	2540	11	2540	11	0.725163
IRA1503	IRA1503_11.FIN2	164	1.46	10.94	0.15	0.4693	0.0059	0.80896	2517	13	2479	26	2544	14	2544	14	0.684932
IRA1503	IRA1503_93.FIN2	301	3.35	12.16	0.19	0.5	0.01	0.588	2615	15	2613	44	2618	27	2618	27	0.298507
IRA1503	IRA1503_14.FIN2	1229	5.33	12.824	0.099	0.5155	0.0035	0.21985	2666.1	7.3	2680	15	2652	13	2652	13	0.187617
IRA1503	IRA1503_42.FIN2	35.6	0.663	13.39	0.23	0.5214	0.0099	0.77014	2707	16	2702	42	2700	21	2700	21	1.5083
IRA1503	IRA1503_64.FIN2	198	9.6	13.52	0.16	0.5251	0.0074	0.7929	2718	12	2719	31	2709	14	2709	14	0.104167
IRA1503	IRA1503_32.FIN2	793	10.15	13.861	0.094	0.5243	0.0041	0.59898	2741	6.4	2717	17	2752	11	2752	11	0.0985222
IRA1503	IRA1503_109.FIN2	877	4.07	13.09	0.11	0.4934	0.0034	0.62329	2685.9	7.7	2585	15	2760	10	2760	10	0.2457
IRA1503	IRA1503_116.FIN2	275.7	0.91	15.76	0.13	0.5661	0.0044	0.71284	2861.6	7.7	2891	18	2846	11	2846	11	1.0989
IRA1511	IRA_1511_1.FIN71	284	2.27	0.0525	0.0028	0.0081	0.00024	0.13789	51.9	2.7	52	1.6	110	120	52	1.6	0.440529	rim
IRA1511	IRA_1511_1.FIN114	631	1.323	0.0573	0.0015	0.00874	0.00011	0.042912	56.5	1.4	56.1	0.69	47	52	56.1	0.69	0.755858	rim
IRA1511	IRA_1511_1.FIN125	528	1.126	0.0591	0.0033	0.00876	0.00022	0.42444	58.3	3.2	56.2	1.4	170	120	56.2	1.4	0.888099	rim
IRA1511	IRA_1511_1.FIN113	744	1.21	0.0601	0.0016	0.00878	0.00015	0.25746	59.2	1.5	56.36	0.99	143	58	56.36	0.99	0.826446	rim
IRA1511	IRA_1511_1.FIN161	653	1.014	0.06	0.0017	0.00883	0.00014	0.0584	59.1	1.7	56.64	0.87	160	75	56.64	0.87	0.986193	rim
IRA1511	IRA_1511_1.FIN150	684	1.07	0.0602	0.0016	0.00898	0.00014	0.30016	59.3	1.5	57.62	0.9	115	55	57.62	0.9	0.934579	rim
IRA1511	IRA_1511_1.FIN14	278.7	1.829	0.0774	0.0033	0.01115	0.0004	0.067286	75.7	3.1	71.4	2.5	180	110	71.4	2.5	0.546747
IRA1511	IRA_1511_1.FIN75	335	1.595	0.074	0.0024	0.01143	0.00021	0.025088	72.4	2.3	73.2	1.3	48	76	73.2	1.3	0.626959
IRA1511	IRA_1511_1.FIN135	732	14.86	0.086	0.0045	0.0126	0.0005	0.64537	83.7	4.2	80.7	3.2	227	98	80.7	3.2	0.0672948
IRA1511	IRA_1511_1.FIN77	1122	4.1	0.0881	0.0089	0.01297	0.00057	0.85745	85.7	8.3	83	3.6	140	150	83	3.6	0.243902
IRA1511	IRA_1511_1.FIN94	680	0.937	0.0914	0.0026	0.01303	0.00022	0.2166	88.8	2.4	83.5	1.4	217	66	83.5	1.4	1.06724
IRA1511	IRA_1511_1.FIN131	1003	19.7	0.0852	0.0073	0.01324	0.0006	0.13904	82.9	6.8	84.8	3.8	50	190	84.8	3.8	0.0507614
IRA1511	IRA_1511_1.FIN142	1120	10.3	0.1007	0.0083	0.0147	0.0012	0.64178	97.4	7.6	94.2	7.5	100	150	94.2	7.5	0.0970874
IRA1511	IRA_1511_1.FIN96	677	13.9	0.1373	0.007	0.0195	0.0012	0.48043	130.6	6.2	124.3	7.5	240	130	124.3	7.5	0.0719424
IRA1511	IRA_1511_1.FIN36	1188	11.5	0.147	0.012	0.02049	0.0008	0.64923	139	10	130.8	5.1	270	240	130.8	5.1	0.0869565
IRA1511	IRA_1511_1.FIN101	802	4.48	0.176	0.015	0.0236	0.0012	0.61229	165	13	150.2	7.5	370	200	150.2	7.5	0.223214
IRA1511	IRA_1511_1.FIN90	801	81	0.17	0.014	0.0246	0.0018	0.86082	160	12	156	11	240	110	156	11	0.0123457
IRA1511	IRA_1511_1.FIN22	304	1.809	0.174	0.0039	0.02458	0.00044	0.24654	162.8	3.4	156.5	2.8	267	56	156.5	2.8	0.552792
IRA1511	IRA_1511_1.FIN26	906	2.75	0.1694	0.0099	0.02497	0.00059	0.56948	158.8	8.6	159	3.7	174	97	159	3.7	0.363636
IRA1511	IRA_1511_1.FIN88	527	3.89	0.1813	0.0084	0.0252	0.001	0.14779	169.1	7.3	160.3	6.5	250	130	160.3	6.5	0.257069
IRA1511	IRA_1511_1.FIN132	474	5.77	0.177	0.0042	0.02532	0.00041	0.385	166	3.8	161.2	2.6	251	61	161.2	2.6	0.17331
IRA1511	IRA_1511_1.FIN78	179	1.015	0.1836	0.0056	0.02577	0.00037	0.20454	171	4.8	164	2.3	272	73	164	2.3	0.985222
IRA1511	IRA_1511_1.FIN29	315	2.78	0.219	0.013	0.0292	0.0014	0.67111	201	11	185.8	9	380	110	185.8	9	0.359712
IRA1511	IRA_1511_1.FIN55	907.7	0.954	0.2006	0.0053	0.02994	0.00052	0.27417	185.6	4.5	190.2	3.3	123	58	190.2	3.3	1.04822
IRA1511	IRA_1511_1.FIN41	1010	13.19	0.2427	0.0083	0.03197	0.00063	0.53937	220.5	6.8	202.9	4	394	72	202.9	4	0.075815
IRA1511	IRA_1511_1.FIN126	2870	2.39	0.251	0.013	0.0327	0.002	0.94511	227	10	208	12	424	46	208	12	0.41841
IRA1511	IRA_1511_1.FIN51	361	2.298	0.2436	0.0066	0.03363	0.00087	0.66208	221.2	5.4	213.2	5.4	314	52	213.2	5.4	0.435161
IRA1511	IRA_1511_1.FIN143	471	1.084	0.2457	0.0053	0.03367	0.00065	0.47128	222.9	4.3	213.5	4	292	48	213.5	4	0.922509
IRA1511	IRA_1511_1.FIN104	101.4	1.161	0.2371	0.0082	0.03425	0.00063	0.07428	215.7	6.7	217.1	4	221	79	217.1	4	0.861326
IRA1511	IRA_1511_1.FIN102	840	3.02	0.272	0.011	0.03527	0.00068	0.42731	244.5	9	223.4	4.2	399	65	223.4	4.2	0.331126
IRA1511	IRA_1511_1.FIN162	371	3.44	0.2647	0.0063	0.03543	0.00063	0.47823	238.3	5.1	224.5	3.9	349	51	224.5	3.9	0.290698
IRA1511	IRA_1511_1.FIN62	41	0.916	0.279	0.015	0.03695	0.00096	0.017218	250	12	233.8	6	380	130	233.8	6	1.0917
IRA1511	IRA_1511_1.FIN80	258	1.312	0.2704	0.0058	0.03789	0.00051	0.60996	242.8	4.6	239.7	3.2	260	42	239.7	3.2	0.762195
IRA1511	IRA_1511_1.FIN27	300	2.03	0.2589	0.0051	0.03812	0.00051	0.12255	234.3	4	241.1	3.2	188	53	241.1	3.2	0.492611
IRA1511	IRA_1511_1.FIN46	761	91.9	0.2972	0.0084	0.0404	0.0023	0.083347	264.2	6.6	256	14	334	92	256	14	0.0108814
IRA1511	IRA_1511_1.FIN20	495	4.34	0.2971	0.0046	0.0415	0.00043	0.43704	264	3.6	262.1	2.7	281	33	262.1	2.7	0.230415
IRA1511	IRA_1511_1.FIN57	900	7.22	0.323	0.012	0.0429	0.0017	0.76844	283.9	9	271	11	433	83	271	11	0.138504
IRA1511	IRA_1511_1.FIN97	325	1.85	0.3156	0.0083	0.0441	0.001	0.69211	280.5	6.4	278.3	6.4	289	45	278.3	6.4	0.540541
IRA1511	IRA_1511_1.FIN92	783	3.53	0.3178	0.0069	0.04439	0.0009	0.58035	280.1	5.3	280	5.6	290	60	280	5.6	0.283286
IRA1511	IRA_1511_1.FIN130	103.4	0.868	0.311	0.01	0.04499	0.00097	0.017567	274.2	7.8	283.6	6	181	76	283.6	6	1.15207
IRA1511	IRA_1511_1.FIN7	440	1.305	0.3523	0.0073	0.04526	0.00052	0.37098	306.2	5.5	285.3	3.2	495	40	285.3	3.2	0.766284
IRA1511	IRA_1511_1.FIN43	843	48.7	0.349	0.013	0.0453	0.0015	0.83672	303.7	9.9	285.5	9.4	476	67	285.5	9.4	0.0205339
IRA1511	IRA_1511_1.FIN21	1001	3.08	0.336	0.012	0.04548	0.00087	0.62938	294.2	9.1	286.7	5.4	339	64	286.7	5.4	0.324675
IRA1511	IRA_1511_1.FIN144	253	2.09	0.3504	0.0067	0.04596	0.00064	0.35028	304.8	5	289.6	3.9	410	42	289.6	3.9	0.478469
IRA1511	IRA_1511_1.FIN13	34.1	0.805	0.355	0.018	0.0465	0.0012	0.15723	309	13	293.2	7.2	440	110	293.2	7.2	1.24224
IRA1511	IRA_1511_1.FIN56	347	16	0.343	0.011	0.0473	0.0012	0.74967	300.2	8.3	297.7	7.2	348	52	297.7	7.2	0.0625
IRA1511	IRA_1511_1.FIN122	370	1.892	0.3504	0.0075	0.04752	0.00059	0.40401	305.5	5.8	299.2	3.6	328	47	299.2	3.6	0.528541
IRA1511	IRA_1511_1.FIN95	124.1	1.154	0.348	0.01	0.0476	0.00089	0.31388	303.2	7.8	299.8	5.5	329	69	299.8	5.5	0.866551
IRA1511	IRA_1511_1.FIN136	693	78.4	0.3531	0.005	0.04805	0.00075	0.36497	307.5	3.6	302.5	4.6	333	36	302.5	4.6	0.0127551
IRA1511	IRA_1511_1.FIN3	428	5.08	0.356	0.012	0.0482	0.0011	0.49616	309.1	8.9	303.4	6.9	349	70	303.4	6.9	0.19685
IRA1511	IRA_1511_1.FIN149	376	0.751	0.3572	0.0069	0.04827	0.00065	0.31752	309.9	5.1	303.9	4	338	44	303.9	4	1.33156
IRA1511	IRA_1511_1.FIN146	89.2	1.222	0.348	0.011	0.0483	0.0011	0.017929	302.6	8.5	304.2	7	321	91	304.2	7	0.818331
IRA1511	IRA_1511_1.FIN103	476.3	4.153	0.352	0.0089	0.04895	0.00073	0.36886	306.1	6.7	308.1	4.5	271	52	308.1	4.5	0.24079
IRA1511	IRA_1511_1.FIN69	590	133	0.359	0.012	0.04908	0.00099	0.54869	311.1	9.1	308.9	6.1	303	70	308.9	6.1	0.0075188
IRA1511	IRA_1511_1.FIN25	667	1.51	0.3559	0.0068	0.04934	0.00081	0.81565	310.9	5.2	310.4	4.9	297	24	310.4	4.9	0.662252
IRA1511	IRA_1511_1.FIN37	469	7.24	0.3578	0.0061	0.04932	0.00054	0.26025	311.2	4.4	310.4	3.3	309	41	310.4	3.3	0.138122
IRA1511	IRA_1511_1.FIN147	801	1.54	0.3627	0.0071	0.04938	0.00081	0.67675	314	5.3	310.7	5	316	33	310.7	5	0.649351
IRA1511	IRA_1511_1.FIN12	371	1.7	0.365	0.0078	0.04946	0.00066	0.44126	315.7	5.8	311.2	4.1	355	46	311.2	4.1	0.588235
IRA1511	IRA_1511_1.FIN155	387	2.16	0.3682	0.0067	0.04984	0.00057	0.42988	318.1	5	313.5	3.5	360	41	313.5	3.5	0.462963
IRA1511	IRA_1511_1.FIN106	527	1.758	0.365	0.006	0.0499	0.00075	0.65548	315.8	4.5	313.9	4.6	299	30	313.9	4.6	0.568828
IRA1511	IRA_1511_1.FIN32	626	9.43	0.409	0.047	0.0503	0.0029	0.60479	346	32	316	18	560	170	316	18	0.106045
IRA1511	IRA_1511_1.FIN24	448	1.849	0.3686	0.0082	0.0505	0.001	0.72887	319.4	6.2	317.4	6.2	279	34	317.4	6.2	0.540833
IRA1511	IRA_1511_1.FIN121	171	1.346	0.3672	0.0082	0.05065	0.0008	0.27153	317.2	6.1	318.5	4.9	285	52	318.5	4.9	0.742942
IRA1511	IRA_1511_1.FIN49	215	1.449	0.3663	0.0096	0.05094	0.00069	0.1254	317.8	6.9	320.3	4.3	298	61	320.3	4.3	0.690131
IRA1511	IRA_1511_1.FIN81	381	2.66	0.3733	0.0051	0.05117	0.00055	0.16402	322	3.8	321.7	3.4	331	35	321.7	3.4	0.37594
IRA1511	IRA_1511_1.FIN30	110.5	1.468	0.378	0.018	0.0516	0.0014	0.38078	330	14	324.5	8.8	325	93	324.5	8.8	0.681199
IRA1511	IRA_1511_1.FIN124	220.1	9.92	0.3841	0.0097	0.05229	0.00095	0.40246	330.6	7.2	328.5	5.8	334	50	328.5	5.8	0.100806
IRA1511	IRA_1511_1.FIN127	417	1.291	0.3757	0.0066	0.05235	0.00064	0.51127	323.7	4.9	328.9	3.9	290	34	328.9	3.9	0.774593
IRA1511	IRA_1511_1.FIN151	193.3	1.343	0.374	0.012	0.0525	0.0016	0.12153	322.4	9.2	329.6	9.5	283	96	329.6	9.5	0.744602
IRA1511	IRA_1511_1.FIN118	608	20.6	0.414	0.01	0.0528	0.0013	0.83046	352	7.2	331.6	8	473	37	331.6	8	0.0485437
IRA1511	IRA_1511_1.FIN58	564	4.31	0.3911	0.0062	0.05291	0.00066	0.16554	335	4.5	332.4	4	364	38	332.4	4	0.232019
IRA1511	IRA_1511_1.FIN40	185.6	5.35	0.4154	0.0095	0.0549	0.0013	0.52757	352.5	6.8	344.3	7.7	370	57	344.3	7.7	0.186916
IRA1511	IRA_1511_1.FIN89	197.8	1.325	0.409	0.015	0.0552	0.001	0.53144	348	11	346.5	6.1	350	68	346.5	6.1	0.754717
IRA1511	IRA_1511_1.FIN141	722	2.03	0.409	0.0085	0.0566	0.0016	0.69848	348	6.2	355.1	9.5	333	45	355.1	9.5	0.492611
IRA1511	IRA_1511_1.FIN18	546	48	0.445	0.011	0.0588	0.001	0.61716	373.8	7.7	368.4	6.1	405	44	368.4	6.1	0.0208333
IRA1511	IRA_1511_1.FIN4	189.7	1.859	0.491	0.015	0.0619	0.0018	0.78772	405	10	387	11	460	56	387	11	0.537924
IRA1511	IRA_1511_1.FIN154	505	3.9	0.4848	0.0076	0.0621	0.0012	0.4678	401.3	5.2	388.3	7	481	42	388.3	7	0.25641
IRA1511	IRA_1511_1.FIN111	250	13.62	0.479	0.013	0.0623	0.0015	0.35146	396.9	9	389.4	8.9	420	61	389.4	8.9	0.0734214
IRA1511	IRA_1511_1.FIN137	942	61.6	0.47	0.0093	0.0634	0.0014	0.7961	391.1	6.4	396.5	8.8	335	27	396.5	8.8	0.0162338
IRA1511	IRA_1511_1.FIN17	577	46	0.4867	0.0065	0.06351	0.00099	0.40735	402.6	4.4	396.9	6	436	37	396.9	6	0.0217391
IRA1511	IRA_1511_1.FIN105	200	5.06	0.496	0.017	0.0636	0.0018	0.32912	409	12	397	11	452	86	397	11	0.197628
IRA1511	IRA_1511_1.FIN31	465	29.5	0.505	0.013	0.0641	0.0017	0.65541	414.6	8.5	400	10	483	40	400	10	0.0338983
IRA1511	IRA_1511_1.FIN6	919	10.8	0.489	0.013	0.0647	0.002	0.51301	403.6	9.1	404	12	409	54	404	12	0.0925926
IRA1511	IRA_1511_1.FIN64	200.1	1.981	0.515	0.013	0.0658	0.0013	0.47436	421.5	8.5	410.9	7.9	465	58	410.9	7.9	0.504796
IRA1511	IRA_1511_1.FIN84	784	7.83	0.502	0.01	0.0663	0.0016	0.71424	413	7.1	414.1	9.7	431	44	414.1	9.7	0.127714
IRA1511	IRA_1511_1.FIN67	820	3.45	0.54	0.012	0.0671	0.0014	0.45462	438.1	7.6	418.9	8.4	517	57	418.9	8.4	0.289855
IRA1511	IRA_1511_1.FIN8	228.6	4.34	0.543	0.011	0.06817	0.0008	0.43973	441.4	7.3	425.1	4.8	522	42	425.1	4.8	0.230415
IRA1511	IRA_1511_1.FIN139	639	23.3	0.553	0.011	0.0684	0.0013	0.39129	447	7.4	426.2	8	562	56	426.2	8	0.0429185
IRA1511	IRA_1511_1.FIN129	243	6.07	0.5443	0.0093	0.06982	0.0008	0.40934	440.9	6.1	435	4.8	465	36	435	4.8	0.164745
IRA1511	IRA_1511_1.FIN15	566	6.25	0.578	0.018	0.0699	0.002	0.32079	463	12	435	12	578	84	435	12	0.16
IRA1511	IRA_1511_1.FIN63	376	2.41	0.576	0.01	0.0706	0.0011	0.4989	461.3	6.4	439.7	6.7	547	35	439.7	6.7	0.414938
IRA1511	IRA_1511_1.FIN42	225.9	9.54	0.578	0.013	0.073	0.0015	0.11903	462.9	8.4	454	9.3	526	72	454	9.3	0.104822
IRA1511	IRA_1511_1.FIN52	178	4.983	0.564	0.011	0.0733	0.001	0.39646	454.6	6.8	456.2	6.2	422	44	456.2	6.2	0.200682
IRA1511	IRA_1511_1.FIN73	318.2	5.79	0.5763	0.0091	0.07366	0.00098	0.45315	461.8	5.9	458.1	5.9	482	33	458.1	5.9	0.172712
IRA1511	IRA_1511_1.FIN159	214	5.1	0.576	0.013	0.074	0.001	0.46382	462.6	8.5	460.3	6.3	513	45	460.3	6.3	0.196078
IRA1511	IRA_1511_1.FIN5	297.7	5.86	0.5787	0.0083	0.0742	0.0018	0.37275	463.5	5.4	461	11	456	49	461	11	0.170648
IRA1511	IRA_1511_1.FIN93	290.1	5.34	0.5898	0.0076	0.07496	0.00077	0.08494	470.5	4.8	465.9	4.6	481	37	465.9	4.6	0.187266
IRA1511	IRA_1511_1.FIN119	260	4.33	0.604	0.022	0.0752	0.0023	0.69691	480	14	468	14	535	61	468	14	0.230947
IRA1511	IRA_1511_1.FIN44	369	19.9	0.609	0.018	0.076	0.0011	0.43235	483	12	471.9	6.9	549	66	471.9	6.9	0.0502513
IRA1511	IRA_1511_1.FIN19	218	13.53	0.581	0.02	0.0761	0.0018	0.53361	468	12	473	11	438	69	473	11	0.0739098
IRA1511	IRA_1511_1.FIN112	474	2.801	0.599	0.0075	0.07685	0.0007	0.39832	476.4	4.8	477.3	4.2	490	25	477.3	4.2	0.357015
IRA1511	IRA_1511_1.FIN99	256	5.108	0.648	0.013	0.0802	0.0013	0.50253	508.1	8.4	497.6	7.8	552	43	497.6	7.8	0.195771
IRA1511	IRA_1511_1.FIN11	183.9	2.841	0.674	0.014	0.08047	0.00093	0.0077459	522.5	8.5	498.9	5.6	633	52	498.9	5.6	0.351989
IRA1511	IRA_1511_1.FIN108	293	2.46	0.634	0.02	0.0806	0.0029	0.74611	498	12	504	16	475	50	504	16	0.406504
IRA1511	IRA_1511_1.FIN33	269.6	6.87	0.63	0.025	0.0815	0.0028	0.30402	496	16	505	17	470	100	505	17	0.14556
IRA1511	IRA_1511_1.FIN134	103.7	0.5746	0.655	0.014	0.0819	0.0011	0.22635	511.4	8.6	507.3	6.5	529	53	507.3	6.5	1.74034
IRA1511	IRA_1511_1.FIN160	444	1.655	0.6845	0.0095	0.08558	0.00092	0.4409	529.3	5.7	529.3	5.4	516	33	529.3	5.4	0.60423
IRA1511	IRA_1511_1.FIN47	598	1.09	0.724	0.014	0.0863	0.0018	0.75136	552.5	8.2	534	11	641	35	534	11	0.917431
IRA1511	IRA_1511_1.FIN85	685.5	2.095	0.698	0.012	0.0867	0.0016	0.56314	537.4	6.9	535.9	9.2	575	37	535.9	9.2	0.477327
IRA1511	IRA_1511_1.FIN9	111	2.21	0.717	0.017	0.0878	0.0018	0.43143	548.7	9.9	543	10	626	50	543	10	0.452489
IRA1511	IRA_1511_1.FIN117	244	1.853	0.756	0.025	0.0884	0.0015	0.10289	571	14	546	8.9	666	76	546	8.9	0.539665
IRA1511	IRA_1511_1.FIN35	164	2.16	0.787	0.051	0.0895	0.0028	0.29187	588	29	553	17	720	140	553	17	0.462963
IRA1511	IRA_1511_1.FIN128	208.4	2.138	0.788	0.024	0.0902	0.0028	0.53994	590	14	556	17	703	61	556	17	0.467727
IRA1511	IRA_1511_1.FIN152	581	1.188	0.735	0.014	0.0902	0.0018	0.62663	560.5	7.8	556	10	585	35	556	10	0.841751
IRA1511	IRA_1511_1.FIN140	293	2.02	0.756	0.012	0.09097	0.00097	0.35267	571.3	7.1	561.2	5.8	621	35	561.2	5.8	0.49505
IRA1511	IRA_1511_1.FIN68	355	1.576	0.761	0.018	0.0938	0.0016	0.74756	576.2	9.8	577.9	9.3	559	36	577.9	9.3	0.634518
IRA1511	IRA_1511_1.FIN82	1039	1.45	0.796	0.015	0.0974	0.0017	0.9004	594.8	8.5	599	9.9	573	16	599	9.9	0.689655
IRA1511	IRA_1511_1.FIN38	962	3.8	0.817	0.012	0.0982	0.0012	0.74116	607.1	6.6	604.1	7	608	21	604.1	7	0.263158
IRA1511	IRA_1511_1.FIN28	148.7	1.116	0.871	0.017	0.101	0.0015	0.232	635.6	9.5	620	9	738	42	620	9	0.896057
IRA1511	IRA_1511_1.FIN120	87.4	1.458	0.857	0.019	0.1023	0.0027	0.44476	628	10	628	16	650	100	628	16	0.685871
IRA1511	IRA_1511_1.FIN16	196.8	1.674	0.857	0.019	0.1024	0.0019	0.16113	628	10	629	11	605	48	629	11	0.597372
IRA1511	IRA_1511_1.FIN138	698	15.36	0.889	0.018	0.1026	0.0016	0.51979	645.4	9.5	629.8	9.6	692	33	629.8	9.6	0.0651042
IRA1511	IRA_1511_1.FIN50	54.2	0.7393	0.885	0.02	0.1033	0.0017	0.14395	643	11	633	10	680	58	633	10	1.35263
IRA1511	IRA_1511_1.FIN91	36.5	1.873	0.904	0.051	0.1035	0.0029	0.38587	652	27	635	17	660	110	635	17	0.533903
IRA1511	IRA_1511_1.FIN109	125.1	0.995	0.871	0.015	0.1038	0.0019	0.6144	635.7	8.3	636	11	646	36	636	11	1.00503
IRA1511	IRA_1511_1.FIN156	179	1.019	1.101	0.021	0.1224	0.0019	0.5618	755	10	744	11	775	32	744	11	0.981354
IRA1511	IRA_1511_1.FIN74	175	1.511	1.101	0.022	0.1225	0.0028	0.66556	753	11	744	16	792	40	744	16	0.661813
IRA1511	IRA_1511_1.FIN70	158.9	2.09	1.079	0.022	0.1228	0.0033	0.4289	743	11	747	19	738	56	747	19	0.478469
IRA1511	IRA_1511_1.FIN34	279	2.474	1.205	0.016	0.1297	0.0013	0.42956	802.5	7.3	786	7.3	855	26	786	7.3	0.404204
IRA1511	IRA_1511_1.FIN72	110.1	1.155	1.438	0.046	0.1481	0.0037	0.46853	903	19	890	21	1000	69	1000	69	0.865801
IRA1511	IRA_1511_1.FIN53	72.2	0.783	1.684	0.031	0.1651	0.0026	0.11031	1003	11	985	15	1007	42	1007	42	1.27714
IRA1511	IRA_1511_1.FIN45	298.4	1.028	1.496	0.029	0.1468	0.0016	0.29617	928	12	882.9	8.8	1024	39	1024	39	0.972763
IRA1511	IRA_1511_1.FIN23	351	1.77	4.121	0.041	0.2909	0.0035	0.66979	1657.9	8.3	1646	18	1664	18	1664	18	0.564972
IRA1511	IRA_1511_1.FIN100	123	0.892	6.103	0.094	0.3583	0.0052	0.45416	1990	14	1974	25	1986	36	1986	36	1.12108
IRA1511	IRA_1511_1.FIN2	124	5.42	4.978	0.083	0.2833	0.0058	0.7861	1818	14	1611	30	2074	22	2074	22	0.184502
IRA1511	IRA_1511_1.FIN10	531	6.85	8.999	0.072	0.414	0.0044	0.75142	2337.6	7.3	2236	20	2428	12	2428	12	0.145985
IRA1511	IRA_1511_1.FIN123	106.4	0.495	10	0.17	0.4522	0.0071	0.68198	2434	16	2404	31	2472	23	2472	23	2.0202
IRA1511	IRA_1511_1.FIN86	49.5	2.45	11.01	0.53	0.484	0.016	0.48559	2521	45	2542	70	2527	71	2527	71	0.408163
IRA1511	IRA_1511_1.FIN157	96.1	1.446	8.47	0.19	0.353	0.011	0.78481	2286	22	1947	50	2593	30	2593	30	0.691563
IRA1511	IRA_1511_1.FIN79	38.1	1.118	10.92	0.24	0.457	0.012	0.42635	2520	22	2424	54	2607	39	2607	39	0.894454
IRA1512	IRA1512_21.FIN2	805	0.781	0.2467	0.0056	0.03579	0.00057	0.48917	223.8	4.5	226.7	3.6	227	48	226.7	3.6	1.28041
IRA1512	IRA1512_33.FIN2	740	0.804	0.2519	0.0045	0.0361	0.00048	0.42149	227.9	3.6	228.6	3	248	37	228.6	3	1.24378
IRA1512	IRA1512_108.FIN2	685	0.776	0.2513	0.0051	0.03625	0.00055	0.69937	227.3	4.2	229.5	3.4	234	35	229.5	3.4	1.28866
IRA1512	IRA1512_16.FIN2	569	0.875	0.2686	0.0069	0.03659	0.00052	0.58202	241.1	5.5	231.6	3.2	351	43	231.6	3.2	1.14286
IRA1512	IRA1512_28.FIN2	875	0.597	0.2573	0.0057	0.03658	0.00067	0.13316	232.4	4.6	231.6	4.2	246	57	231.6	4.2	1.67504
IRA1512	IRA1512_99.FIN2	302	0.581	0.2595	0.0056	0.03663	0.00037	0.11302	234.4	4.4	231.9	2.3	264	49	231.9	2.3	1.72117
IRA1512	IRA1512_84.FIN2	521	0.841	0.2597	0.0047	0.03685	0.00037	0.27444	234.2	3.8	233.3	2.3	217	39	233.3	2.3	1.18906
IRA1512	IRA1512_106.FIN2	419.6	0.838	0.2557	0.0043	0.03705	0.00032	0.19363	231	3.5	234.5	2	208	42	234.5	2	1.19332
IRA1512	IRA1512_20.FIN2	646	0.6749	0.2734	0.0041	0.03755	0.00037	0.3238	245.3	3.2	237.6	2.3	344	37	237.6	2.3	1.4817
IRA1512	IRA1512_71.FIN2	768	1.706	0.266	0.0043	0.03765	0.00035	0.4448	239.6	3.5	238.2	2.2	278	34	238.2	2.2	0.586166
IRA1512	IRA1512_29.FIN2	481	0.608	0.2658	0.0054	0.0377	0.00032	0.13912	239.1	4.3	238.5	2	244	42	238.5	2	1.64474
IRA1512	IRA1512_9.FIN2	614	0.642	0.2654	0.005	0.03797	0.0004	0.38921	238.7	4	240.2	2.5	206	38	240.2	2.5	1.55763
IRA1512	IRA1512_109.FIN2	705	1.092	0.2654	0.0038	0.03812	0.00032	0.20263	238.8	3.1	241.2	2	223	36	241.2	2	0.915751
IRA1512	IRA1512_107.FIN2	426	0.813	0.267	0.005	0.03819	0.0004	0.42586	240.1	4	241.6	2.5	253	40	241.6	2.5	1.23001
IRA1512	IRA1512_74.FIN2	375	1.519	0.263	0.014	0.03847	0.00064	0.18094	236	11	243.3	4	190	110	243.3	4	0.658328
IRA1512	IRA1512_47.FIN2	1035	1.407	0.2734	0.0039	0.03858	0.00033	0.41431	245.6	3.2	244	2	260	31	244	2	0.710732
IRA1512	IRA1512_36.FIN2	1066	1.646	0.2741	0.0034	0.03892	0.00031	0.32567	246.1	2.7	246.1	1.9	249	27	246.1	1.9	0.607533
IRA1512	IRA1512_98.FIN2	32.27	11.2	0.283	0.017	0.0391	0.00086	0.042894	254	13	247.2	5.3	330	120	247.2	5.3	0.0892857
IRA1512	IRA1512_89.FIN2	59.2	1.876	0.268	0.015	0.04	0.00079	0.027387	240	12	252.8	4.9	120	110	252.8	4.9	0.533049
IRA1512	IRA1512_6.FIN2	530	1.2045	0.3745	0.0065	0.04983	0.00039	0.19261	322.7	4.8	313.4	2.4	371	39	313.4	2.4	0.83022
IRA1512	IRA1512_72.FIN2	964	10.8	0.391	0.017	0.0501	0.0019	0.70644	335	13	315	12	493	69	315	12	0.0925926
IRA1512	IRA1512_65.FIN2	165.3	1.874	0.4112	0.0097	0.0542	0.00069	0.1216	351.4	6.9	340.2	4.2	405	59	340.2	4.2	0.533618
IRA1512	IRA1512_51.FIN2	404.8	2.598	0.64	0.01	0.07976	0.00072	0.28437	502.1	6.5	494.7	4.3	521	35	494.7	4.3	0.384911
IRA1512	IRA1512_49.FIN2	650	21	0.656	0.023	0.0824	0.0035	0.80197	512	14	510	21	515	67	510	21	0.047619
IRA1512	IRA1512_87.FIN2	611	1.307	0.69	0.012	0.0832	0.0015	0.64787	532.1	7.5	514.9	8.9	592	27	514.9	8.9	0.765111
IRA1512	IRA1512_94.FIN2	1284	1.966	0.6959	0.0086	0.0858	0.0013	0.54982	536	5.2	530.7	7.4	539	28	530.7	7.4	0.508647
IRA1512	IRA1512_60.FIN2	83	0.4645	0.701	0.023	0.0878	0.0014	0.24491	540	14	543.6	8	502	70	543.6	8	2.15285
IRA1512	IRA1512_78.FIN2	262	1.378	0.709	0.037	0.0881	0.0016	0.87337	544	21	544	9.7	540	77	544	9.7	0.725689
IRA1512	IRA1512_61.FIN2	659	12.26	0.736	0.013	0.0884	0.0015	0.55365	562.2	7.8	545.8	8.9	615	35	545.8	8.9	0.0815661
IRA1512	IRA1512_92.FIN2	341	1.39	0.763	0.012	0.0906	0.0011	0.46052	575.3	6.9	558.7	6.6	650	35	558.7	6.6	0.719424
IRA1512	IRA1512_86.FIN2	35.8	0.842	0.779	0.035	0.0954	0.0019	0.3058	582	20	589	11	523	92	589	11	1.18765
IRA1512	IRA1512_115.FIN2	754	3.85	0.7849	0.0094	0.09603	0.00096	0.60785	587.9	5.4	591	5.7	566	24	591	5.7	0.25974
IRA1512	IRA1512_114.FIN2	88.6	0.948	0.794	0.019	0.0969	0.0011	0.34866	592	11	595.9	6.7	570	48	595.9	6.7	1.05485
IRA1512	IRA1512_105.FIN2	357.3	2.01	0.8	0.011	0.09791	0.00087	0.39912	596.8	6.5	602.1	5.1	598	31	602.1	5.1	0.497512
IRA1512	IRA1512_48.FIN2	871	3.99	0.813	0.02	0.0999	0.0022	0.61676	606	12	614	13	576	47	614	13	0.250627
IRA1512	IRA1512_17.FIN2	315	0.422	0.839	0.014	0.1001	0.0011	0.37673	618.2	8	614.8	6.2	623	37	614.8	6.2	2.36967
IRA1512	IRA1512_2.FIN2	296	1.749	0.857	0.014	0.1013	0.0011	0.58874	629.3	7.7	622.1	6.5	639	26	622.1	6.5	0.571755
IRA1512	IRA1512_68.FIN2	121.6	2.089	0.864	0.018	0.1019	0.0012	0.22336	632.8	9.8	626.6	6.8	673	47	626.6	6.8	0.478698
IRA1512	IRA1512_5.FIN2	41.2	0.771	0.85	0.035	0.1024	0.0023	0.35228	622	19	628	13	580	82	628	13	1.29702
IRA1512	IRA1512_82.FIN2	332	3.993	0.863	0.014	0.1024	0.0013	0.75132	631.8	7.6	628.6	7.7	646	32	628.6	7.7	0.250438
IRA1512	IRA1512_83.FIN2	155	1.317	0.859	0.016	0.1027	0.0012	0.57898	628.4	8.6	629.9	7.3	611	41	629.9	7.3	0.759301
IRA1512	IRA1512_4.FIN2	231.7	2.05	0.859	0.012	0.10279	0.00065	0.16336	630	6.6	631.1	3.8	603	32	631.1	3.8	0.487805
IRA1512	IRA1512_76.FIN2	333	1.76	0.863	0.014	0.1029	0.0012	0.53112	631.2	7.6	631.5	6.8	672	31	631.5	6.8	0.568182
IRA1512	IRA1512_15.FIN2	69.4	0.951	0.859	0.021	0.1033	0.0015	0.25654	627	11	633.4	8.5	603	51	633.4	8.5	1.05152
IRA1512	IRA1512_67.FIN2	536	2.081	0.8638	0.0088	0.10384	0.00096	0.50972	631.9	4.8	636.8	5.6	646	24	636.8	5.6	0.480538
IRA1512	IRA1512_7.FIN2	127	2.908	0.864	0.022	0.1039	0.0017	0.47698	634	12	637	10	613	48	637	10	0.343879
IRA1512	IRA1512_88.FIN2	234	0.848	0.878	0.011	0.10398	0.00099	0.29632	639	6.1	637.6	5.8	632	29	637.6	5.8	1.17925
IRA1512	IRA1512_118.FIN2	565	1.197	0.883	0.011	0.10473	0.00085	0.62711	642.1	6.1	642	4.9	645	26	642	4.9	0.835422
IRA1512	IRA1512_90.FIN2	176	1.651	0.893	0.021	0.1048	0.0015	0.46092	648	11	642.6	8.7	661	42	642.6	8.7	0.605694
IRA1512	IRA1512_111.FIN2	334	1.597	0.897	0.018	0.1067	0.0015	0.49451	649.7	9.7	653.2	8.6	685	45	653.2	8.6	0.626174
IRA1512	IRA1512_1.FIN2	427	0.821	0.905	0.011	0.107	0.0011	0.49878	654.4	5.9	655.3	6.1	616	22	655.3	6.1	1.21803
IRA1512	IRA1512_79.FIN2	478	2.97	0.967	0.048	0.1092	0.0043	0.89152	685	25	668	25	739	72	668	25	0.3367
IRA1512	IRA1512_116.FIN2	150.6	1.967	0.955	0.019	0.11072	0.00091	0.29435	681.3	9.8	676.9	5.3	692	41	676.9	5.3	0.508388
IRA1512	IRA1512_40.FIN2	232	1.194	0.945	0.015	0.11178	0.00097	0.22555	675.7	7.8	683	5.6	663	34	683	5.6	0.837521
IRA1512	IRA1512_56.FIN2	154.1	3.54	0.949	0.016	0.1123	0.0013	0.28437	677.5	8.6	686.1	7.4	636	39	686.1	7.4	0.282486
IRA1512	IRA1512_74.FIN2	522	1.768	0.995	0.017	0.1131	0.0011	0.36487	701	8.7	690.9	6.5	763	36	690.9	6.5	0.565611
IRA1512	IRA1512_23.FIN2	194.6	0.682	1.096	0.022	0.1208	0.0012	0.12623	751	10	734.9	6.7	807	48	734.9	6.7	1.46628
IRA1512	IRA1512_119.FIN2	888	3.33	1.0547	0.009	0.12117	0.00099	0.5385	731.3	4.5	737.2	5.7	720	17	737.2	5.7	0.3003
IRA1512	IRA1512_14.FIN2	80.5	0.885	1.09	0.022	0.1224	0.0014	0.06405	747	11	744.4	7.8	734	47	744.4	7.8	1.12994
IRA1512	IRA1512_101.FIN2	340	0.361	1.098	0.017	0.1227	0.0015	0.4522	751.8	8.4	745.8	8.8	795	32	745.8	8.8	2.77008
IRA1512	IRA1512_70.FIN2	306	1.786	1.112	0.017	0.1233	0.0013	0.29448	758.7	8.2	749.4	7.5	800	34	749.4	7.5	0.55991
IRA1512	IRA1512_97.FIN2	265.3	0.737	1.106	0.016	0.1235	0.0014	0.62366	755.5	7.6	750.4	7.9	785	25	750.4	7.9	1.35685
IRA1512	IRA1512_45.FIN2	223	1.12	1.128	0.015	0.126	0.0013	0.30077	766.9	7.2	765	7.6	766	32	765	7.6	0.892857
IRA1512	IRA1512_96.FIN2	89.5	0.931	1.121	0.028	0.1263	0.0016	0.2987	764	14	766.7	9.4	765	47	766.7	9.4	1.07411
IRA1512	IRA1512_18.FIN2	88.2	2.668	1.101	0.026	0.1264	0.0015	0.19814	755	12	767	8.7	744	48	767	8.7	0.374813
IRA1512	IRA1512_41.FIN2	31.8	1.261	1.169	0.054	0.1265	0.0051	0.64906	782	26	767	29	857	86	767	29	0.793021
IRA1512	IRA1512_113.FIN2	343	3.31	1.144	0.013	0.1269	0.00088	0.53596	774.4	6	770.1	5	789	23	770.1	5	0.302115
IRA1512	IRA1512_103.FIN2	314	1.14	1.15	0.016	0.1288	0.0011	0.47754	777.1	7.4	781	6.2	779	26	781	6.2	0.877193
IRA1512	IRA1512_44.FIN2	421	1.793	1.207	0.014	0.1342	0.0011	0.54745	804.6	6.7	811.5	6.3	798	24	811.5	6.3	0.557724
IRA1512	IRA1512_38.FIN2	270	1.16	1.232	0.031	0.1349	0.0019	0.62454	814	14	816	11	812	42	816	11	0.862069
IRA1512	IRA1512_80.FIN2	251.6	1.46	1.314	0.023	0.1396	0.002	0.66332	852.3	9.7	842	11	892	29	842	11	0.684932
IRA1512	IRA1512_73.FIN2	114.2	1.535	1.283	0.024	0.1396	0.0016	0.24107	838	11	843.1	8.7	838	42	843.1	8.7	0.651466
IRA1512	IRA1512_77.FIN2	186.9	1.652	1.313	0.026	0.1414	0.0018	0.60503	852	11	854	11	844	35	844	11	0.605327
IRA1512	IRA1512_53.FIN2	158.6	4.28	1.31	0.029	0.1401	0.0023	0.70458	849	13	845	13	852	31	845	13	0.233645
IRA1512	IRA1512_43.FIN2	373	22.5	1.403	0.046	0.1485	0.0044	0.5778	888	19	892	25	861	51	861	51	0.0444444
IRA1512	IRA1512_31.FIN2	108.3	0.628	1.333	0.022	0.1435	0.0019	0.27843	858.9	9.6	864	11	874	36	874	36	1.59236
IRA1512	IRA1512_120.FIN2	91.7	2.02	1.423	0.033	0.1497	0.0026	0.53501	900	14	899	15	912	40	912	40	0.49505
IRA1512	IRA1512_25.FIN2	179.1	2.07	1.54	0.028	0.1587	0.0019	0.48903	945	11	949	10	920	32	920	32	0.483092
IRA1512	IRA1512_93.FIN2	58.9	1.61	1.558	0.037	0.1604	0.0026	0.31407	952	15	958	15	935	53	935	53	0.621118
IRA1512	IRA1512_95.FIN2	540	6.22	1.497	0.013	0.1547	0.0012	0.51246	929.2	5.3	927.6	7	936	17	936	17	0.160772
IRA1512	IRA1512_63.FIN2	104	0.81	1.528	0.026	0.159	0.0014	0.37768	941	10	951.3	7.9	938	33	938	33	1.23457
IRA1512	IRA1512_24.FIN2	68.8	2.067	1.604	0.037	0.1647	0.002	0.25902	973	14	983	11	949	46	949	46	0.483793
IRA1512	IRA1512_22.FIN2	232.5	0.91	1.469	0.021	0.1513	0.002	0.46244	917.1	8.7	908	11	953	28	953	28	1.0989
IRA1512	IRA1512_19.FIN2	1269	40.3	1.467	0.017	0.1501	0.0019	0.69412	916.3	6.9	901	11	958	20	958	20	0.0248139
IRA1512	IRA1512_75.FIN2	55.4	2.008	1.459	0.032	0.1485	0.003	0.49037	915	13	892	17	962	42	962	42	0.498008
IRA1512	IRA1512_110.FIN2	416	2.91	1.551	0.015	0.1571	0.0013	0.25437	951.1	6	940.8	7.2	965	24	965	24	0.343643
IRA1512	IRA1512_102.FIN2	203	1.77	1.612	0.033	0.1655	0.0025	0.76972	974	13	987	14	974	23	974	23	0.564972
IRA1512	IRA1512_66.FIN2	75	1.182	1.561	0.036	0.1564	0.0029	0.47456	954	15	936	16	978	46	978	46	0.846024
IRA1512	IRA1512_50.FIN2	86.1	1.088	1.631	0.035	0.1642	0.0017	0.25925	980	13	979.7	9.2	979	43	979	43	0.919118
IRA1512	IRA1512_58.FIN2	225.8	1.53	1.566	0.026	0.1587	0.0018	0.57965	956	10	949.6	9.9	984	30	984	30	0.653595
IRA1512	IRA1512_112.FIN2	114.9	1.453	1.746	0.032	0.1747	0.0024	0.5517	1025	12	1037	13	999	31	999	31	0.688231
IRA1512	IRA1512_30.FIN2	493.4	1.917	1.793	0.024	0.1776	0.0016	0.48687	1045.9	8.7	1053.8	8.8	1042	27	1042	27	0.521648
IRA1512	IRA1512_62.FIN2	232	1.405	1.853	0.024	0.1824	0.0017	0.62271	1064.5	8.7	1079.9	9.4	1043	23	1043	23	0.711744
IRA1512	IRA1512_35.FIN2	561	1.917	1.569	0.013	0.1524	0.0011	0.57334	957.7	5	914.3	6.4	1060	17	1060	17	0.521648
IRA1512	IRA1512_55.FIN2	168	0.604	1.821	0.031	0.1767	0.0018	0.63472	1051	11	1049	9.9	1068	27	1068	27	1.65563
IRA1512	IRA1512_64.FIN2	269.1	1.335	1.825	0.019	0.1761	0.0014	0.48109	1054.8	6.8	1045.6	7.8	1074	19	1074	19	0.749064
IRA1512	IRA1512_3.FIN2	105.5	1.136	1.739	0.033	0.1661	0.0028	0.48499	1022	12	990	15	1087	39	1087	39	0.880282
IRA1512	IRA1512_34.FIN2	74.7	1.927	2.078	0.037	0.1988	0.0028	0.56071	1141	13	1170	15	1089	33	1089	33	0.518941
IRA1512	IRA1512_11.FIN2	732	3.15	1.86	0.018	0.1739	0.0016	0.56746	1066.5	6.5	1033.3	8.7	1112	18	1112	18	0.31746
IRA1512	IRA1512_78.FIN2	444	2.015	2.332	0.026	0.1978	0.0015	0.59648	1221.6	8	1163.2	7.9	1338	18	1338	18	0.496278
IRA1512	IRA1512_72.FIN2	50.3	0.541	4.188	0.09	0.2903	0.0044	0.55424	1672	17	1642	22	1727	36	1727	36	1.84843
IRA1512	IRA1512_10.FIN2	76.2	0.913	5.428	0.065	0.3459	0.0033	0.61628	1891	11	1914	16	1856	19	1856	19	1.09529
IRA1512	IRA1512_52.FIN2	134.2	0.575	5.463	0.052	0.3437	0.0024	0.49405	1893.8	8.3	1904	11	1881	16	1881	16	1.73913
IRA1512	IRA1512_81.FIN2	16.8	1.71	5.75	0.32	0.347	0.019	0.84454	1921	49	1910	90	1911	65	1911	65	0.584795
IRA1512	IRA1512_69.FIN2	152.9	1.418	5.377	0.048	0.3297	0.0029	0.55675	1882	7.7	1838	14	1949	16	1949	16	0.705219
IRA1512	IRA1512_32.FIN2	327	1.129	6.268	0.051	0.3736	0.0027	0.72249	2014.5	7.3	2046	13	1991	12	1991	12	0.88574
IRA1512	IRA1512_37.FIN2	48.2	0.28	5.97	0.13	0.3563	0.0054	0.64071	1971	18	1964	26	2009	28	2009	28	3.57143
IRA1512	IRA1512_59.FIN2	134.7	2.81	5.89	0.12	0.3367	0.0075	0.88528	1957	18	1869	36	2068	19	2068	19	0.355872
IRA1512	IRA1512_85.FIN2	185.6	1.864	8.537	0.094	0.3846	0.004	0.68218	2290	10	2097	19	2439	15	2439	15	0.536481
IRA1512	IRA1512_81.FIN2	59.5	2.91	11.36	0.41	0.511	0.018	0.88287	2550	34	2657	78	2452	27	2452	27	0.343643
IRA1512	IRA1512_26.FIN2	120.5	1.037	11.197	0.093	0.4932	0.0042	0.5964	2542.5	7.2	2584	18	2510	13	2510	13	0.96432
IRA1512	IRA1512_27.FIN2	583	2.367	11.019	0.092	0.4863	0.0046	0.6527	2523.9	7.8	2554	20	2511	12	2511	12	0.422476
IRA1512	IRA1512_13.FIN2	107.1	3.93	9.48	0.15	0.4146	0.0061	0.3814	2385	15	2236	28	2512	29	2512	29	0.254453
IRA1512	IRA1512_54.FIN2	97.2	1.39	10.96	0.12	0.4794	0.0049	0.69135	2520.3	9.9	2524	22	2517	13	2517	13	0.719424
IRA1512	IRA1512_37.FIN2	47.2	0.641	10.37	0.33	0.447	0.011	0.79123	2480	34	2380	49	2555	38	2555	38	1.56006
IRA1512	IRA1512_46.FIN2	212	1.551	11.55	0.2	0.4843	0.0071	0.94606	2567	16	2551	33	2576	12	2576	12	0.644745
IRA1512	IRA1512_42.FIN2	174	1.094	11.76	0.26	0.4908	0.0087	0.63139	2584	21	2573	38	2590	33	2590	33	0.914077
IRA1512	IRA1512_117.FIN2	149	1.75	12.99	0.14	0.5216	0.0049	0.58984	2682	10	2705	21	2655	14	2655	14	0.571429
IRA1512	IRA1512_39.FIN2	184.6	4.66	12.61	0.12	0.4942	0.0047	0.6245	2650.6	8.8	2588	20	2699	13	2699	13	0.214592
IRA1512	IRA1512_100.FIN2	209.4	1.316	26.86	0.24	0.6797	0.0062	0.73272	3377.7	8.8	3342	24	3401	10	3401	10	0.759878
IRA1513	IRA_1513_1.FIN113	2377	293	0.0472	0.0031	0.00694	0.00024	0.38355	46.9	3.1	44.6	1.5	330	130	44.6	1.5	0.00341297	rim
IRA1513	IRA_1513_1.FIN139	765	211	0.0484	0.0043	0.00701	0.00033	0.44443	48	4.1	45	2.1	290	160	45	2.1	0.00473934	rim
IRA1513	IRA_1513_1.FIN138	1970	172	0.0456	0.0011	0.00703	0.00011	0.12075	45.3	1.1	45.17	0.72	70	61	45.17	0.72	0.00581395	rim
IRA1513	IRA_1513_1.FIN133	1103	216	0.0465	0.0023	0.00728	0.00034	0.21182	46.1	2.3	46.7	2.2	150	250	46.7	2.2	0.00462963	rim
IRA1513	IRA_1513_1.FIN4	2820	47.4	0.0536	0.0026	0.00744	0.00017	0.52964	53.1	2.5	47.8	1.1	303	93	47.8	1.1	0.021097	rim
IRA1513	IRA_1513_1.FIN116	4690	406	0.0545	0.001	0.00823	0.00013	0.48929	53.85	0.99	52.84	0.84	129	37	52.84	0.84	0.00246305	rim
IRA1513	IRA_1513_1.FIN2	2365	60.6	0.0628	0.0027	0.00904	0.00033	0.76333	61.9	2.6	58	2.1	257	65	58	2.1	0.0165017	rim
IRA1513	IRA_1513_1.FIN46	1860	29.2	0.0637	0.0041	0.00917	0.00054	0.37366	62.6	3.9	58.8	3.4	210	160	58.8	3.4	0.0342466	rim
IRA1513	IRA_1513_1.FIN53	1044	17.42	0.0715	0.0042	0.00986	0.00026	0.58158	70.1	4	63.2	1.7	330	120	63.2	1.7	0.0574053	rim
IRA1513	IRA_1513_1.FIN94	1427	157	0.072	0.014	0.0102	0.001	0.38022	70	13	65.4	6.5	220	380	65.4	6.5	0.00636943	rim
IRA1513	IRA_1513_1.FIN135	690	35.5	0.0859	0.0067	0.01188	0.00045	0.33724	83.6	6.2	76.1	2.8	310	160	76.1	2.8	0.028169
IRA1513	IRA_1513_1.FIN141	1490	29.5	0.0915	0.0027	0.01283	0.00037	0.60926	88.9	2.5	82.2	2.4	275	54	82.2	2.4	0.0338983
IRA1513	IRA_1513_1.FIN104	1095	16.5	0.0951	0.0046	0.01298	0.00039	0.63504	92.2	4.2	83.2	2.5	358	94	83.2	2.5	0.0606061
IRA1513	IRA_1513_1.FIN60	1170	15.9	0.0944	0.0062	0.01329	0.00029	0.41877	91.6	5.7	85.1	1.9	250	170	85.1	1.9	0.0628931
IRA1513	IRA_1513_1.FIN71	1410	24	0.0999	0.005	0.01363	0.0007	0.59615	96.7	4.6	87.3	4.5	320	110	87.3	4.5	0.0416667
IRA1513	IRA_1513_1.FIN13	1650	23	0.1028	0.0071	0.01403	0.00063	0.62338	99.4	6.5	89.8	4	320	140	89.8	4	0.0434783
IRA1513	IRA_1513_1.FIN39	2208	9.73	0.12	0.0066	0.01693	0.00076	0.53523	115	6	108.2	4.8	250	79	108.2	4.8	0.102775
IRA1513	IRA_1513_1.FIN29	428	4.43	0.233	0.011	0.0309	0.0011	0.59538	212.6	8.9	196.3	7.2	435	77	196.3	7.2	0.225734
IRA1513	IRA_1513_1.FIN144	572	4.26	0.2367	0.0076	0.0316	0.0014	0.33981	215.6	6.2	200.6	9	300	110	200.6	9	0.234742
IRA1513	IRA_1513_1.FIN47	908	6.94	0.2275	0.0082	0.03182	0.00063	0.60445	209.4	7.1	201.9	3.9	316	61	201.9	3.9	0.144092
IRA1513	IRA_1513_1.FIN18	870	4.67	0.2475	0.0072	0.03185	0.00083	0.82073	224.3	5.9	202.1	5.2	454	41	202.1	5.2	0.214133
IRA1513	IRA_1513_1.FIN140	207	1.088	0.269	0.013	0.03598	0.00055	0.36147	241	11	227.8	3.4	430	120	227.8	3.4	0.919118
IRA1513	IRA_1513_1.FIN147	237	1.52	0.2693	0.0062	0.03752	0.00059	0.36067	242	5	237.4	3.6	292	50	237.4	3.6	0.657895
IRA1513	IRA_1513_1.FIN40	413	2.586	0.3356	0.0075	0.04639	0.00079	0.38604	293.7	5.7	292.3	4.8	311	54	292.3	4.8	0.386698
IRA1513	IRA_1513_1.FIN54	233	1.95	0.355	0.011	0.04753	0.00078	0.1874	307.8	7.9	299.3	4.8	357	71	299.3	4.8	0.512821
IRA1513	IRA_1513_1.FIN15	519	2.68	0.3461	0.0069	0.04814	0.00091	0.36158	301.7	5.2	303.1	5.6	309	55	303.1	5.6	0.373134
IRA1513	IRA_1513_1.FIN3	430	5.61	0.387	0.02	0.0487	0.0019	0.26721	332	15	307	11	510	120	307	11	0.178253
IRA1513	IRA_1513_1.FIN108	420	2.496	0.3541	0.0062	0.04904	0.00059	0.48429	308.2	4.6	308.6	3.6	316	36	308.6	3.6	0.400641
IRA1513	IRA_1513_1.FIN64	537	3.853	0.3795	0.0068	0.0497	0.0011	0.51639	326.6	5	312.6	6.6	441	44	312.6	6.6	0.259538
IRA1513	IRA_1513_1.FIN93	320	1.662	0.3658	0.0063	0.05003	0.00069	0.4716	317	4.8	314.7	4.2	340	37	314.7	4.2	0.601685
IRA1513	IRA_1513_1.FIN27	198.5	1.767	0.3625	0.0073	0.05038	0.00081	0.33702	313.8	5.4	316.8	5	281	49	316.8	5	0.565931
IRA1513	IRA_1513_1.FIN31	253.6	3.302	0.3626	0.0068	0.05042	0.0007	0.087834	314	5.1	317.1	4.3	287	49	317.1	4.3	0.302847
IRA1513	IRA_1513_1.FIN145	267	2.025	0.3742	0.0078	0.05113	0.00089	0.4106	322.5	5.8	321.4	5.4	343	45	321.4	5.4	0.493827
IRA1513	IRA_1513_1.FIN123	587	3.74	0.436	0.012	0.0535	0.0015	0.72244	367.1	8.1	335.6	8.9	601	37	335.6	8.9	0.26738
IRA1513	IRA_1513_1.FIN88	419	15.3	0.446	0.016	0.0578	0.0022	0.81092	377.7	9	362	14	480	59	362	14	0.0653595
IRA1513	IRA_1513_1.FIN14	252.7	3.11	0.451	0.01	0.05792	0.00099	0.40206	378.5	7.3	363	6	453	49	363	6	0.321543
IRA1513	IRA_1513_1.FIN95	274	8.49	0.489	0.013	0.0624	0.0011	0.61522	403.9	8.8	390	7	505	48	390	7	0.117786
IRA1513	IRA_1513_1.FIN65	140.1	5.61	0.486	0.021	0.0625	0.0022	0.53641	408	14	391	14	415	96	391	14	0.178253
IRA1513	IRA_1513_1.FIN131	114.2	3.274	0.535	0.017	0.0654	0.0012	0.40483	434	11	408.1	7.3	567	63	408.1	7.3	0.305437
IRA1513	IRA_1513_1.FIN50	148.5	3.8	0.512	0.016	0.0656	0.0018	0.51611	421	10	410	11	481	54	410	11	0.263158
IRA1513	IRA_1513_1.FIN112	238	2.539	0.525	0.015	0.0659	0.0014	0.6318	429.6	9.8	412.9	8.1	518	44	412.9	8.1	0.393856
IRA1513	IRA_1513_1.FIN142	194	3.13	0.506	0.014	0.0662	0.0011	0.44615	416.9	9.6	413.5	6.7	457	57	413.5	6.7	0.319489
IRA1513	IRA_1513_1.FIN6	274	1.858	0.52	0.0086	0.0678	0.0013	0.38545	425	5.7	422.8	7.6	453	52	422.8	7.6	0.538213
IRA1513	IRA_1513_1.FIN48	143.1	3.6	0.526	0.014	0.0685	0.0014	0.75213	431	10	426.8	8.7	470	38	426.8	8.7	0.277778
IRA1513	IRA_1513_1.FIN52	302.2	7	0.5412	0.0097	0.069	0.001	0.28916	438.9	6.4	430.2	6.3	503	37	430.2	6.3	0.142857
IRA1513	IRA_1513_1.FIN61	144.6	3.188	0.527	0.014	0.0691	0.0016	0.38757	429.5	9.6	431.8	9.3	415	61	431.8	9.3	0.313676
IRA1513	IRA_1513_1.FIN11	170	1.168	0.573	0.026	0.0693	0.0023	0.84347	465	17	432	14	619	51	432	14	0.856164
IRA1513	IRA_1513_1.FIN68	127.3	1.136	0.604	0.04	0.0701	0.0015	0.068724	479	25	436.7	9.1	690	160	436.7	9.1	0.880282
IRA1513	IRA_1513_1.FIN137	244	2.865	0.564	0.011	0.07014	0.00093	0.52451	454.1	6.8	436.9	5.6	569	34	436.9	5.6	0.34904
IRA1513	IRA_1513_1.FIN96	221	8.93	0.5456	0.0083	0.0704	0.001	0.19414	441.8	5.4	438.4	6.1	473	37	438.4	6.1	0.111982
IRA1513	IRA_1513_1.FIN132	212.3	1.96	0.561	0.011	0.0709	0.0012	0.37041	451.5	7	441.2	7.4	508	41	441.2	7.4	0.510204
IRA1513	IRA_1513_1.FIN148	197	6.02	0.5489	0.0092	0.07131	0.00088	0.23741	443.9	6	444	5.3	452	40	444	5.3	0.166113
IRA1513	IRA_1513_1.FIN83	471	3.137	0.5565	0.0072	0.07138	0.00081	0.29113	449.1	4.7	444.4	4.9	483	33	444.4	4.9	0.318776
IRA1513	IRA_1513_1.FIN72	137.7	3.742	0.564	0.014	0.0718	0.0011	0.29312	453.5	8.8	446.9	6.8	473	51	446.9	6.8	0.267237
IRA1513	IRA_1513_1.FIN124	356	7.38	0.618	0.02	0.0719	0.0021	0.13498	488	13	447	13	689	54	447	13	0.135501
IRA1513	IRA_1513_1.FIN126	158.3	2.2	0.5497	0.009	0.07207	0.0008	0.46926	445.3	6.1	448.6	4.8	443	36	448.6	4.8	0.454545
IRA1513	IRA_1513_1.FIN44	173.2	5.71	0.5594	0.0093	0.0723	0.00086	0.35067	450.8	6	449.9	5.2	462	44	449.9	5.2	0.175131
IRA1513	IRA_1513_1.FIN143	158.8	2.852	0.5583	0.009	0.07239	0.00083	0.3609	450.1	5.9	450.5	5	439	39	450.5	5	0.350631
IRA1513	IRA_1513_1.FIN36	239	3.106	0.562	0.011	0.07286	0.00093	0.54976	452.2	7	453.3	5.6	451	35	453.3	5.6	0.321958
IRA1513	IRA_1513_1.FIN100	197.3	1.62	0.584	0.011	0.0747	0.0011	0.482	468.7	6.3	464.2	6.6	478	41	464.2	6.6	0.617284
IRA1513	IRA_1513_1.FIN33	46.1	2.806	0.685	0.028	0.0771	0.0022	0.051407	531	16	479	13	783	97	479	13	0.356379
IRA1513	IRA_1513_1.FIN105	44	0.927	0.669	0.038	0.0794	0.0029	0.49542	522	22	493	18	600	100	493	18	1.07875
IRA1513	IRA_1513_1.FIN92	206	3.511	0.681	0.022	0.0794	0.0021	0.080237	527	14	493	13	682	95	493	13	0.284819
IRA1513	IRA_1513_1.FIN98	175	4.5	0.671	0.026	0.0807	0.0028	0.6705	521	16	500	17	608	65	500	17	0.222222
IRA1513	IRA_1513_1.FIN59	52.8	2.109	0.673	0.03	0.0849	0.005	0.4611	526	20	525	30	560	120	525	30	0.474158
IRA1513	IRA_1513_1.FIN119	123	2.724	0.737	0.014	0.0875	0.0013	0.41135	559.8	8.1	540.6	7.7	650	43	540.6	7.7	0.367107
IRA1513	IRA_1513_1.FIN24	208.3	1.125	0.724	0.015	0.0887	0.0019	0.36015	552.6	8.7	548	11	589	56	548	11	0.888889
IRA1513	IRA_1513_1.FIN25	207.9	1.019	0.73	0.013	0.0892	0.0013	0.18574	556.4	7.6	550.6	7.5	589	49	550.6	7.5	0.981354
IRA1513	IRA_1513_1.FIN58	318	2.733	0.788	0.021	0.0901	0.002	0.62541	589	12	556	12	705	54	556	12	0.365898
IRA1513	IRA_1513_1.FIN75	116.4	13.5	0.994	0.071	0.0936	0.0041	0.95025	616	26	569	24	973	47	569	24	0.0740741
IRA1513	IRA_1513_1.FIN22	101	22.1	0.799	0.028	0.0928	0.0033	0.96833	590	17	573	20	653	22	573	20	0.0452489
IRA1513	IRA_1513_1.FIN30	775	3.98	0.852	0.013	0.0945	0.0017	0.64641	625.4	7.2	582	9.9	785	31	582	9.9	0.251256
IRA1513	IRA_1513_1.FIN86	219.5	2.113	0.775	0.041	0.0946	0.0043	0.7457	582	23	582	26	584	80	582	26	0.473261
IRA1513	IRA_1513_1.FIN77	105.4	2.536	0.835	0.032	0.0955	0.0036	0.26106	623	21	588	21	740	110	588	21	0.394322
IRA1513	IRA_1513_1.FIN41	185	1.004	0.846	0.017	0.0991	0.0014	0.45446	621.7	9.4	608.8	8.1	644	34	608.8	8.1	0.996016
IRA1513	IRA_1513_1.FIN81	158	0.683	0.808	0.017	0.0995	0.0015	0.50495	602.5	9.1	611.3	8.7	597	39	611.3	8.7	1.46413
IRA1513	IRA_1513_1.FIN115	82.5	1.387	0.819	0.019	0.1008	0.0017	0.26937	607	10	618.8	9.9	607	56	618.8	9.9	0.720981
IRA1513	IRA_1513_1.FIN121	142.1	4.75	0.843	0.025	0.1012	0.0027	0.8504	622	14	621	16	651	44	621	16	0.210526
IRA1513	IRA_1513_1.FIN19	98.6	0.955	0.846	0.017	0.1026	0.0014	0.33552	621.6	9.3	629.7	8.4	577	45	629.7	8.4	1.04712
IRA1513	IRA_1513_1.FIN38	162	1.95	0.867	0.02	0.1027	0.0018	0.25722	636	11	630	11	652	55	630	11	0.512821
IRA1513	IRA_1513_1.FIN37	176.6	2.35	0.882	0.016	0.1035	0.0014	0.19313	643.1	8.7	634.9	8.3	675	46	634.9	8.3	0.425532
IRA1513	IRA_1513_1.FIN28	343.9	4.13	0.953	0.015	0.105	0.002	0.75396	679.5	7.6	644	12	797	23	644	12	0.242131
IRA1513	IRA_1513_1.FIN7	121.2	1.017	0.875	0.016	0.1057	0.0016	0.33432	639	8.2	647.5	9.5	610	39	647.5	9.5	0.983284
IRA1513	IRA_1513_1.FIN129	244	2.486	0.899	0.013	0.1067	0.001	0.35746	651	7.2	653.8	6.1	659	31	653.8	6.1	0.402253
IRA1513	IRA_1513_1.FIN107	104.9	1.877	0.923	0.032	0.1068	0.002	0.50609	666	18	654	12	722	64	654	12	0.532765
IRA1513	IRA_1513_1.FIN23	233	4.686	0.961	0.011	0.1109	0.0012	0.48594	683.6	5.5	678.1	7.1	725	26	678.1	7.1	0.213402
IRA1513	IRA_1513_1.FIN134	74	5.22	1.007	0.022	0.1131	0.0018	0.28415	707	11	691	11	774	56	691	11	0.191571
IRA1513	IRA_1513_1.FIN102	229	1.134	1.084	0.044	0.1155	0.0037	0.64778	750	20	704	21	877	57	704	21	0.881834
IRA1513	IRA_1513_1.FIN103	171.9	2.207	1.134	0.029	0.1219	0.0026	0.66872	769	14	741	15	856	40	741	15	0.453104
IRA1513	IRA_1513_1.FIN117	94.1	0.895	1.09	0.032	0.1228	0.0023	0.050364	748	16	746	13	802	74	746	13	1.11732
IRA1513	IRA_1513_1.FIN110	130	1.169	1.298	0.026	0.1331	0.002	0.61953	844	12	805	11	976	41	805	11	0.855432
IRA1513	IRA_1513_1.FIN51	21.3	1.38	1.529	0.081	0.1635	0.0049	0.11589	938	32	981	28	810	110	810	28	0.724638
IRA1513	IRA_1513_1.FIN55	286	1.107	1.261	0.022	0.1351	0.0031	0.50906	828	10	816	18	850	40	816	18	0.903342
IRA1513	IRA_1513_1.FIN89	153.3	1.171	1.359	0.033	0.1386	0.0027	0.45927	871	14	837	15	927	52	837	15	0.853971
IRA1513	IRA_1513_1.FIN62	27.6	0.475	1.358	0.054	0.1395	0.0048	0.085438	869	23	841	27	920	120	841	27	2.10526
IRA1513	IRA_1513_1.FIN82	42.1	0.644	1.491	0.034	0.1541	0.0023	0.28044	927	13	923	13	935	48	935	48	1.5528
IRA1513	IRA_1513_1.FIN69	138	0.3586	1.594	0.032	0.1602	0.0024	0.3397	969	12	958	13	970	42	970	42	2.78862
IRA1513	IRA_1513_1.FIN128	122	3.84	1.542	0.029	0.1563	0.002	0.56895	946	12	936	11	993	29	993	29	0.260417
IRA1513	IRA_1513_1.FIN56	139	1.163	1.41	0.037	0.142	0.0033	0.69851	894	15	856	19	993	36	993	36	0.859845
IRA1513	IRA_1513_1.FIN80	242	1.0493	1.561	0.016	0.1571	0.0016	0.21804	955.8	6.6	940.7	9	1003	29	1003	29	0.953016
IRA1513	IRA_1513_1.FIN101	96.1	0.4746	1.61	0.031	0.1602	0.0023	0.40795	973	12	958	13	1012	41	1012	41	2.10704
IRA1513	IRA_1513_1.FIN70	154.1	0.918	1.693	0.03	0.1659	0.0021	0.36977	1009	11	989	12	1044	36	1044	36	1.08932
IRA1513	IRA_1513_1.FIN99	126	1.239	1.769	0.027	0.1736	0.0023	0.54549	1033.6	9.9	1032	13	1051	29	1051	29	0.807103
IRA1513	IRA_1513_1.FIN73	41.05	3.553	1.89	0.068	0.1836	0.0057	0.0728	1076	24	1086	31	1062	94	1062	94	0.281452
IRA1513	IRA_1513_1.FIN63	69.9	1.272	1.604	0.049	0.1533	0.0041	0.52388	971	19	919	23	1092	56	1092	56	0.786164
IRA1513	IRA_1513_1.FIN12	205	3.788	1.856	0.023	0.1765	0.0021	0.62414	1065.4	8	1048	11	1097	29	1097	29	0.263992
IRA1513	IRA_1513_1.FIN111	150.6	1.039	4.977	0.069	0.323	0.0055	0.69659	1815	12	1804	27	1847	24	1847	24	0.962464
IRA1513	IRA_1513_1.FIN45	218	1.681	4.89	0.17	0.311	0.012	0.86591	1799	29	1745	61	1866	22	1866	22	0.594884
IRA1513	IRA_1513_1.FIN26	143.4	2.169	3.799	0.061	0.2399	0.005	0.64379	1594	14	1390	25	1875	28	1875	28	0.461042
IRA1513	IRA_1513_1.FIN66	133.7	1.691	5.82	0.11	0.3428	0.0064	0.78457	1948	16	1899	31	1997	18	1997	18	0.591366
IRA1513	IRA_1513_1.FIN120	53	0.829	5.49	0.2	0.309	0.012	0.80131	1897	31	1733	58	2104	29	2104	29	1.20627
IRA1513	IRA_1513_1.FIN17	307.2	1.062	7.382	0.06	0.3732	0.0035	0.54957	2158.5	7.3	2044	16	2261	14	2261	14	0.94162
IRA1513	IRA_1513_1.FIN84	278.9	1.355	9.38	0.12	0.3786	0.0057	0.7311	2375	11	2069	27	2640	17	2640	17	0.738007
IRA1513	IRA_1513_1.FIN146	136.7	1.052	13.47	0.17	0.5166	0.0084	0.7673	2714	11	2684	36	2734	16	2734	16	0.95057
IRA1514	IRA_1514_105.FIN2	1201	0.886	0.1947	0.0033	0.02598	0.00029	0.58067	180.5	2.8	165.4	1.8	378	33	165.4	1.8	1.12867
IRA1514	IRA_1514_51.FIN2	1202	0.733	0.2363	0.0049	0.03196	0.00073	0.76936	215.2	4	202.8	4.5	339	32	202.8	4.5	1.36426
IRA1514	IRA_1514_48.FIN2	320.1	0.957	0.2456	0.006	0.03226	0.00067	0.38079	222.8	4.9	204.6	4.2	441	63	204.6	4.2	1.04493
IRA1514	IRA_1514_2.FIN2	180.9	1.132	0.241	0.011	0.03307	0.0008	0.32674	219	8.8	209.7	5	328	91	209.7	5	0.883392
IRA1514	IRA_1514_106.FIN2	466	0.846	0.2408	0.0054	0.03431	0.00044	0.2558	218.9	4.4	217.5	2.8	249	49	217.5	2.8	1.18203
IRA1514	IRA_1514_63.FIN2	460.5	1.023	0.2527	0.0044	0.03519	0.00047	0.35805	228.6	3.6	222.9	3	294	38	222.9	3	0.977517
IRA1514	IRA_1514_58.FIN2	539	0.791	0.2583	0.0042	0.03552	0.00034	0.22425	233.1	3.3	225	2.1	314	38	225	2.1	1.26422
IRA1514	IRA_1514_82.FIN2	545	0.772	0.2483	0.0047	0.03588	0.00048	0.46991	225	3.8	227.2	3	214	39	227.2	3	1.29534
IRA1514	IRA_1514_113.FIN2	552	0.747	0.2509	0.0044	0.03622	0.00039	0.33244	227.8	3.5	229.3	2.5	199	36	229.3	2.5	1.33869
IRA1514	IRA_1514_26.FIN2	531	0.772	0.256	0.0054	0.03638	0.00053	0.31992	231.1	4.4	230.4	3.3	264	50	230.4	3.3	1.29534
IRA1514	IRA_1514_10.FIN2	300	0.693	0.2508	0.0052	0.03641	0.00038	0.023959	227.4	4.2	230.5	2.4	179	49	230.5	2.4	1.443
IRA1514	IRA_1514_95.FIN2	357	1.013	0.2539	0.0052	0.03646	0.00039	0.28871	229.8	4.2	230.8	2.4	200	45	230.8	2.4	0.987167
IRA1514	IRA_1514_59.FIN2	360.3	0.931	0.2573	0.0052	0.03676	0.0004	0.11912	232.2	4.2	232.7	2.5	248	46	232.7	2.5	1.07411
IRA1514	IRA_1514_120.FIN2	449	0.859	0.2482	0.0044	0.03683	0.00041	0.37029	225.3	3.5	233.1	2.6	163	39	233.1	2.6	1.16414
IRA1514	IRA_1514_14.FIN2	488	0.863	0.258	0.0047	0.03708	0.00047	0.33692	232.8	3.8	234.7	2.9	237	40	234.7	2.9	1.15875
IRA1514	IRA_1514_91.FIN2	671	0.6905	0.2592	0.0039	0.03718	0.0004	0.27397	234.2	3.1	235.3	2.5	223	37	235.3	2.5	1.44823
IRA1514	IRA_1514_49.FIN2	591	0.888	0.2571	0.0039	0.03721	0.00053	0.13569	232.5	3.1	235.5	3.3	205	43	235.5	3.3	1.12613
IRA1514	IRA_1514_21.FIN2	680	0.715	0.2601	0.0043	0.03722	0.00052	0.21357	234.6	3.4	235.6	3.2	195	43	235.6	3.2	1.3986
IRA1514	IRA_1514_94.FIN2	310	0.985	0.2623	0.0059	0.03731	0.00041	0.20527	236.6	4.8	236.1	2.6	246	51	236.1	2.6	1.01523
IRA1514	IRA_1514_60.FIN2	320	1.134	0.2635	0.0065	0.03744	0.00039	0.43191	237.6	5.3	236.9	2.5	269	51	236.9	2.5	0.881834
IRA1514	IRA_1514_98.FIN2	773	3.934	0.498	0.011	0.0609	0.0012	0.37795	410.1	7.5	382.5	7.5	564	44	382.5	7.5	0.254194
IRA1514	IRA_1514_46.FIN2	307	2.978	0.5541	0.0088	0.07048	0.00088	0.13331	448.2	5.8	439	5.3	479	41	439	5.3	0.335796
IRA1514	IRA_1514_104.FIN2	428.5	3.084	0.5583	0.0087	0.07116	0.00072	0.44914	450.6	5.6	443.1	4.3	447	31	443.1	4.3	0.324254
IRA1514	IRA_1514_53.FIN2	206	3.41	0.636	0.022	0.0738	0.0018	0.49221	500	13	459	11	653	60	459	11	0.293255
IRA1514	IRA_1514_5.FIN2	306.6	4.63	0.675	0.013	0.0789	0.0018	0.35233	523.4	7.9	489	11	646	52	489	11	0.215983
IRA1514	IRA_1514_80.FIN2	258.3	3.033	0.672	0.011	0.08338	0.00095	0.39012	521.2	6.9	516.2	5.6	553	40	516.2	5.6	0.329707
IRA1514	IRA_1514_116.FIN2	270	6.18	0.705	0.015	0.085	0.0014	0.59977	540.8	8.7	525.9	8.3	619	36	525.9	8.3	0.161812
IRA1514	IRA_1514_77.FIN2	164	1.832	0.661	0.015	0.0851	0.0011	0.25637	514.4	9.1	526.6	6.6	474	47	526.6	6.6	0.545852
IRA1514	IRA_1514_98.FIN2	368.6	2.351	0.706	0.019	0.0853	0.0019	0.77904	542	11	528	11	579	34	528	11	0.425351
IRA1514	IRA_1514_93.FIN2	80.6	0.62	0.715	0.024	0.0892	0.002	0.61245	549	15	550	12	596	59	550	12	1.6129
IRA1514	IRA_1514_38.FIN2	232	0.758	0.739	0.018	0.0899	0.002	0.61718	560	11	554	12	597	46	554	12	1.31926
IRA1514	IRA_1514_13.FIN2	194	2.06	0.759	0.014	0.0921	0.0016	0.31029	572.2	8.3	567.9	9.6	571	48	567.9	9.6	0.485437
IRA1514	IRA_1514_17.FIN2	228.3	0.592	0.812	0.017	0.0942	0.0015	0.44813	603.8	9.3	580.3	8.6	675	36	580.3	8.6	1.68919
IRA1514	IRA_1514_100.FIN2	230	40.6	0.776	0.014	0.09502	0.00093	0.23975	583.1	7.6	585.1	5.5	575	40	585.1	5.5	0.0246305
IRA1514	IRA_1514_4.FIN2	161.6	1.237	0.811	0.015	0.0952	0.0012	0.18259	602	8.6	585.9	7	659	45	585.9	7	0.808407
IRA1514	IRA_1514_107.FIN2	12.59	0.772	0.825	0.055	0.0958	0.0035	0.11838	607	30	589	20	700	150	589	20	1.29534
IRA1514	IRA_1514_65.FIN2	709	5.34	0.806	0.012	0.0958	0.0011	0.73345	600.5	6.9	589.9	6.4	643	20	589.9	6.4	0.187266
IRA1514	IRA_1514_89.FIN2	1203	7.871	0.7978	0.0074	0.09583	0.00087	0.59703	595.4	4.2	589.9	5.1	617	18	589.9	5.1	0.127049
IRA1514	IRA_1514_76.FIN2	87.5	0.625	0.852	0.024	0.0964	0.001	0.065698	625	13	593	6	743	61	593	6	1.6
IRA1514	IRA_1514_35.FIN2	590	4.82	0.798	0.014	0.0976	0.0014	0.75003	595.9	8	600	8.2	610	24	600	8.2	0.207469
IRA1514	IRA_1514_114.FIN2	423	2.808	0.844	0.016	0.0999	0.0013	0.66785	622.5	9	613.8	7.3	648	29	613.8	7.3	0.356125
IRA1514	IRA_1514_72.FIN2	73.2	2.911	0.826	0.019	0.1	0.0012	0.14594	610	11	614.3	7.1	602	56	614.3	7.1	0.343525
IRA1514	IRA_1514_1.FIN2	46.8	1.237	0.893	0.028	0.1001	0.0014	0.38261	645	15	614.9	8.1	754	64	614.9	8.1	0.808407
IRA1514	IRA_1514_111.FIN2	191	0.767	0.84	0.02	0.1003	0.0015	0.60609	618	11	615.7	8.7	618	39	615.7	8.7	1.30378
IRA1514	IRA_1514_16.FIN2	196	0.982	0.832	0.015	0.1016	0.0012	0.29035	615.7	7.9	623.6	6.9	595	43	623.6	6.9	1.01833
IRA1514	IRA_1514_108.FIN2	248.6	2.21	0.846	0.021	0.1017	0.0022	0.70547	625	12	624	13	625	37	624	13	0.452489
IRA1514	IRA_1514_25.FIN2	288	5.88	0.855	0.016	0.1019	0.002	0.58392	627.4	8.8	625	12	637	38	625	12	0.170068
IRA1514	IRA_1514_57.FIN2	129.2	1.165	0.859	0.015	0.1022	0.0011	0.21438	628.5	8.1	627.2	6.4	620	39	627.2	6.4	0.858369
IRA1514	IRA_1514_112.FIN2	155	1.034	0.862	0.018	0.1026	0.0011	0.37501	630.2	9.9	629.7	6.6	613	46	629.7	6.6	0.967118
IRA1514	IRA_1514_29.FIN2	87.5	2.635	0.877	0.021	0.1042	0.0014	0.32415	643	11	638.7	8.4	636	47	638.7	8.4	0.379507
IRA1514	IRA_1514_78.FIN2	337	1.885	0.885	0.015	0.1043	0.0014	0.33508	642.8	7.8	641.3	8.1	654	36	641.3	8.1	0.530504
IRA1514	IRA_1514_43.FIN2	37	11.3	0.876	0.036	0.1056	0.0026	0.36999	636	19	647	15	557	85	647	15	0.0884956
IRA1514	IRA_1514_70.FIN2	353	1.347	0.972	0.021	0.1069	0.0025	0.65047	688	11	654	15	841	42	654	15	0.74239
IRA1514	IRA_1514_30.FIN2	65	3.138	0.907	0.022	0.107	0.0016	0.27268	653	11	655.3	9.1	652	53	655.3	9.1	0.318674
IRA1514	IRA_1514_39.FIN2	169.1	1.231	0.892	0.015	0.1075	0.00094	0.30516	647.4	8	658.2	5.5	623	37	658.2	5.5	0.812348
IRA1514	IRA_1514_45.FIN2	338.5	5.663	0.9389	0.0087	0.1095	0.0011	0.28833	672	4.5	669.9	6.3	682	24	669.9	6.3	0.176585
IRA1514	IRA_1514_71.FIN2	46.32	1.92	0.987	0.044	0.1103	0.0028	0.53144	696	23	674	16	777	85	674	16	0.520833
IRA1514	IRA_1514_40.FIN2	100.6	3.51	0.941	0.023	0.1105	0.0017	0.36243	671	12	675.5	9.9	677	51	675.5	9.9	0.2849
IRA1514	IRA_1514_15.FIN2	154	2.83	0.973	0.024	0.1115	0.0016	0.2469	689	12	681.3	9.1	685	55	681.3	9.1	0.353357
IRA1514	IRA_1514_27.FIN2	268	4.878	0.957	0.012	0.11215	0.00092	0.21318	681.9	6.4	685.2	5.4	660	31	685.2	5.4	0.205002
IRA1514	IRA_1514_33.FIN2	383	5.4	0.978	0.022	0.1127	0.0026	0.65375	691	11	688	15	713	43	688	15	0.185185
IRA1514	IRA_1514_119.FIN2	115.4	2.723	1.012	0.02	0.1142	0.0015	0.42174	709	10	697.1	8.8	738	39	697.1	8.8	0.367242
IRA1514	IRA_1514_64.FIN2	240.1	2.712	1.035	0.017	0.1163	0.0012	0.53447	721.5	8.7	709.2	6.7	736	30	709.2	6.7	0.368732
IRA1514	IRA_1514_68.FIN2	80	0.857	1.008	0.024	0.1168	0.0015	0.11065	707	12	711.9	8.6	676	56	711.9	8.6	1.16686
IRA1514	IRA_1514_34.FIN2	820	12.8	1.043	0.06	0.1176	0.0062	0.88558	722	29	716	36	765	53	716	36	0.078125
IRA1514	IRA_1514_44.FIN2	136.9	2.56	1.019	0.017	0.1185	0.0011	0.52238	713.4	8.7	721.9	6.5	689	37	721.9	6.5	0.390625
IRA1514	IRA_1514_110.FIN2	338	31.9	1.077	0.03	0.1223	0.0023	0.86564	743	14	743	13	736	30	743	13	0.031348
IRA1514	IRA_1514_103.FIN2	66.5	0.523	1.112	0.03	0.1255	0.0017	0.18673	758	15	761.9	9.7	748	62	761.9	9.7	1.91205
IRA1514	IRA_1514_55.FIN2	72.3	0.869	1.117	0.023	0.1255	0.0015	0.066867	760	11	763	8.6	752	52	763	8.6	1.15075
IRA1514	IRA_1514_32.FIN2	124.9	0.864	1.2	0.031	0.1275	0.0023	0.39149	802	15	774	13	845	50	774	13	1.15741
IRA1514	IRA_1514_31.FIN2	99.9	3.03	1.237	0.03	0.1283	0.0021	0.27579	817	13	778	12	944	52	778	12	0.330033
IRA1514	IRA_1514_36.FIN2	305	2.15	1.146	0.015	0.1283	0.0016	0.19103	774.9	7.1	778.9	9.4	761	34	778.9	9.4	0.465116
IRA1514	IRA_1514_115.FIN2	173.3	2.025	1.178	0.02	0.1289	0.0022	0.40066	790.6	9.4	781	12	786	39	781	12	0.493827
IRA1514	IRA_1514_61.FIN2	533	4.42	1.262	0.026	0.1296	0.0019	0.64686	827	12	786	11	948	31	786	11	0.226244
IRA1514	IRA_1514_54.FIN2	450	2.207	1.235	0.017	0.1337	0.0016	0.46502	816.8	8	808.5	9.2	838	29	808.5	9.2	0.453104
IRA1514	IRA_1514_79.FIN2	155	2.309	1.227	0.022	0.134	0.0014	0.35644	811	10	810.4	8.2	814	36	810.4	8.2	0.433088
IRA1514	IRA_1514_8.FIN2	132.2	2.02	1.252	0.021	0.1341	0.001	0.21557	825.9	9.4	811.4	6	839	37	811.4	6	0.49505
IRA1514	IRA_1514_56.FIN2	218	1.032	1.364	0.017	0.1466	0.0014	0.31683	874.1	7	881.6	7.9	836	25	836	7.9	0.968992
IRA1514	IRA_1514_28.FIN2	86.7	1.609	1.327	0.028	0.1429	0.0019	0.15512	857	13	863	11	853	50	853	50	0.621504
IRA1514	IRA_1514_81.FIN2	190	1.679	1.464	0.019	0.1529	0.0017	0.27945	915.6	7.8	917.1	9.5	911	30	911	30	0.595593
IRA1514	IRA_1514_90.FIN2	93.1	1.573	1.559	0.028	0.1613	0.0017	0.25918	955	11	963.8	9.3	912	38	912	38	0.635728
IRA1514	IRA_1514_85.FIN2	550	6.8	1.495	0.02	0.1552	0.0014	0.52358	930.5	8	929.9	8	917	23	917	23	0.147059
IRA1514	IRA_1514_109.FIN2	380	2.52	1.425	0.052	0.1494	0.0039	0.92888	896	23	897	22	932	38	932	38	0.396825
IRA1514	IRA_1514_47.FIN2	23.8	2.88	1.628	0.056	0.1685	0.0028	0.3224	981	21	1003	15	943	65	943	65	0.347222
IRA1514	IRA_1514_24.FIN2	182.7	2.152	1.459	0.025	0.1484	0.0016	0.52288	913	10	891.7	9.1	967	31	967	31	0.464684
IRA1514	IRA_1514_42.FIN2	60.3	1.71	1.666	0.058	0.1652	0.004	0.63837	991	22	985	22	970	57	970	57	0.584795
IRA1514	IRA_1514_50.FIN2	243	1.127	1.645	0.019	0.1665	0.0018	0.21204	987.6	7.4	992.4	9.9	979	29	979	29	0.887311
IRA1514	IRA_1514_84.FIN2	132	7.69	1.414	0.028	0.1422	0.0019	0.53593	896	12	857	11	991	35	991	35	0.130039
IRA1514	IRA_1514_67.FIN2	194.5	0.956	1.671	0.029	0.1651	0.0029	0.57432	998	11	984	16	995	33	995	33	1.04603
IRA1514	IRA_1514_3.FIN2	196	0.768	1.642	0.023	0.1635	0.0015	0.29518	985.4	9	976.1	8.1	996	25	996	25	1.30208
IRA1514	IRA_1514_101.FIN2	195.6	1.259	1.564	0.019	0.157	0.0011	0.41019	955.5	7.7	940.2	6.2	999	24	999	24	0.794281
IRA1514	IRA_1514_52.FIN2	131.6	1.505	1.617	0.022	0.1611	0.0021	0.25819	975.8	8.6	963	12	1007	35	1007	35	0.664452
IRA1514	IRA_1514_19.FIN2	130	1.137	1.739	0.034	0.1724	0.0036	0.47548	1022	13	1025	20	1011	47	1011	47	0.879507
IRA1514	IRA_1514_7.FIN2	308	1.818	1.503	0.03	0.1509	0.003	0.4892	930	12	906	17	1016	43	1016	43	0.550055
IRA1514	IRA_1514_20.FIN2	67.2	0.508	1.825	0.038	0.1766	0.0025	0.54314	1052	13	1048	14	1041	38	1041	38	1.9685
IRA1514	IRA_1514_22.FIN2	368	1.619	1.823	0.019	0.1761	0.0019	0.51727	1053.4	6.8	1045	10	1054	20	1054	20	0.617665
IRA1514	IRA_1514_41.FIN2	1179	9.77	2.515	0.036	0.1874	0.0024	0.74518	1277	11	1107	13	1578	18	1578	18	0.102354
IRA1514	IRA_1514_74.FIN2	110	1.289	4.712	0.079	0.3076	0.0045	0.63793	1771	14	1728	22	1811	24	1811	24	0.775795
IRA1514	IRA_1514_23.FIN2	405	1.839	4.44	0.08	0.2812	0.0052	0.73057	1721	15	1599	27	1858	26	1858	26	0.543774
IRA1514	IRA_1514_12.FIN2	398	1.332	5.282	0.04	0.3359	0.0033	0.4415	1865.4	6.5	1867	16	1861	17	1861	17	0.750751
IRA1514	IRA_1514_69.FIN2	294	3.27	5.345	0.062	0.3397	0.0045	0.61333	1875.8	9.8	1884	22	1871	19	1871	19	0.30581
IRA1514	IRA_1514_88.FIN2	456	1.19	5.558	0.032	0.348	0.0026	0.40917	1909.4	4.9	1925	13	1897	13	1897	13	0.840336
IRA1514	IRA_1514_37.FIN2	293.2	9.84	4.648	0.091	0.2875	0.0047	0.71781	1756	16	1628	23	1900	26	1900	26	0.101626
IRA1514	IRA_1514_75.FIN2	166	2.86	5.81	0.17	0.356	0.0079	0.85717	1942	27	1961	38	1920	30	1920	30	0.34965
IRA1514	IRA_1514_18.FIN2	84.1	0.4157	4.748	0.089	0.2859	0.0032	0.43083	1774	16	1621	16	1929	31	1929	31	2.40558
IRA1514	IRA_1514_97.FIN2	212.2	1.516	4.732	0.065	0.2886	0.0035	0.69621	1772	11	1634	17	1945	19	1945	19	0.659631
IRA1514	IRA_1514_99.FIN2	43.2	0.419	5.43	0.11	0.3255	0.0057	0.34001	1889	17	1816	28	1949	36	1949	36	2.38663
IRA1514	IRA_1514_118.FIN2	268.8	0.8219	6.048	0.086	0.3596	0.0053	0.77483	1982	12	1980	25	1977	16	1977	16	1.21669
IRA1514	IRA_1514_102.FIN2	124.1	0.678	5.979	0.061	0.3404	0.0025	0.5449	1973.2	8.7	1888	12	2050	16	2050	16	1.47493
IRA1514	IRA_1514_96.FIN2	125.3	1.173	6.75	0.12	0.3179	0.004	0.75667	2076	16	1779	20	2398	19	2398	19	0.852515
IRA1514	IRA_1514_73.FIN2	773	11.1	10.02	0.15	0.4536	0.007	0.87708	2435	14	2410	31	2469	18	2469	18	0.0900901
IRA1514	IRA_1514_11.FIN2	162.5	1.263	9.66	0.16	0.418	0.007	0.54559	2402	15	2250	32	2519	27	2519	27	0.791766
IRA1514	IRA_1514_66.FIN2	117.4	1.275	11.006	0.09	0.4775	0.0034	0.34664	2523.1	7.6	2516	15	2524	16	2524	16	0.784314
IRA1514	IRA_1514_83.FIN2	342	3.35	9.639	0.088	0.4135	0.0064	0.54063	2400.3	8.4	2233	28	2546	21	2546	21	0.298507
IRA1514	IRA_1514_6.FIN2	394	1.999	10.92	0.13	0.4572	0.0099	0.63001	2515	11	2424	44	2574	27	2574	27	0.50025
IRA1514	IRA_1514_9.FIN2	891	13.8	9.23	0.18	0.3595	0.0092	0.39971	2358	18	1978	43	2683	40	2683	40	0.0724638
IRA1514	IRA_1514_86.FIN2	262.7	1.783	26.52	0.22	0.6763	0.0042	0.63459	3367.6	8.2	3332	16	3385	10	3385	10	0.560852
IRA1801	IRA1801_80.FIN2	3300	100	0.049	0.0021	0.00668	0.00019	0.19594	48.6	2.1	42.9	1.2	340	100	42.9	1.2	0.01	rim
IRA1801	IRA1801_16.FIN2	4290	32.2	0.0583	0.0028	0.00768	0.00021	0.29759	57.5	2.7	49.3	1.4	411	97	49.3	1.4	0.0310559	rim
IRA1801	IRA1801_127.FIN2	2780	58.3	0.0635	0.004	0.00878	0.00043	0.8097	62.5	3.8	56.3	2.7	323	86	56.3	2.7	0.0171527	rim
IRA1801	IRA1801_34.FIN2	1630	14	0.0638	0.0038	0.00948	0.0006	0.61397	62.7	3.6	60.8	3.9	170	110	60.8	3.9	0.0714286	rim
IRA1801	IRA1801_41.FIN2	1840	15.2	0.0868	0.0052	0.01202	0.0004	0.36409	84.4	4.8	77	2.6	290	100	77	2.6	0.0657895	rim
IRA1801	IRA1801_21.FIN2	1256	9.35	0.1204	0.0072	0.0159	0.0011	0.66576	115.4	6.5	101.9	7.2	420	120	101.9	7.2	0.106952	rim
IRA1801	IRA1801_75.FIN2	1188	1.432	0.256	0.01	0.03473	0.00054	0.71018	231	7.9	220.1	3.3	317	62	220.1	3.3	0.698324
IRA1801	IRA1801_55.FIN2	699	4.85	0.2508	0.0037	0.03558	0.0003	0.30232	227.1	3	225.4	1.9	244	33	225.4	1.9	0.206186
IRA1801	IRA1801_108.FIN2	1345	2.01	0.2556	0.0054	0.03733	0.00047	0.2293	231	4.3	236.3	2.9	253	50	236.3	2.9	0.497512
IRA1801	IRA1801_49.FIN2	1033	3.526	0.2647	0.0072	0.0376	0.00058	0.26703	238.3	5.8	237.9	3.6	232	70	237.9	3.6	0.283607
IRA1801	IRA1801_18.FIN2	143	2.22	0.309	0.03	0.0377	0.0016	0.37738	273	24	238	10	590	250	238	10	0.45045
IRA1801	IRA1801_125.FIN2	808	2.564	0.2633	0.004	0.03784	0.00036	0.14143	237.2	3.2	239.4	2.2	229	33	239.4	2.2	0.390016
IRA1801	IRA1801_85.FIN2	1951	5.27	0.3277	0.0078	0.03992	0.00094	0.61328	287.7	5.9	252.3	5.8	578	45	252.3	5.8	0.189753
IRA1801	IRA1801_76.FIN2	1105	20.61	0.3146	0.0055	0.04016	0.00066	0.82341	277.5	4.3	253.8	4.1	464	29	253.8	4.1	0.0485201
IRA1801	IRA1801_32.FIN2	873	11.92	0.33	0.017	0.0411	0.0028	0.37182	289	13	259	18	550	140	259	18	0.0838926
IRA1801	IRA1801_88.FIN2	466	2.89	0.343	0.015	0.045	0.0014	0.33793	300	11	283.9	8.5	410	120	283.9	8.5	0.346021
IRA1801	IRA1801_23.FIN2	937	2.02	0.3668	0.0071	0.04939	0.00081	0.10063	317.2	5.3	310.7	5	364	52	310.7	5	0.49505
IRA1801	IRA1801_12.FIN2	437	2.462	0.372	0.011	0.05043	0.00088	0.29948	322.7	9.2	317.2	5.4	360	71	317.2	5.4	0.406174
IRA1801	IRA1801_33.FIN2	532	4.67	0.399	0.019	0.0521	0.0018	0.29889	341	14	327	11	440	110	327	11	0.214133
IRA1801	IRA1801_5.FIN2	648	3.32	0.4274	0.0076	0.05492	0.00072	0.51922	362	5.2	344.7	4.4	452	35	344.7	4.4	0.301205
IRA1801	IRA1801_78.FIN2	310.3	1.824	0.43	0.019	0.0567	0.0016	0.65468	362	13	355.7	9.4	382	72	355.7	9.4	0.548246
IRA1801	IRA1801_126.FIN2	333	4.95	0.437	0.012	0.0577	0.0011	0.40536	367.5	8.7	361.8	6.8	418	60	361.8	6.8	0.20202
IRA1801	IRA1801_88.FIN2	448	4.9	0.455	0.02	0.0601	0.0023	0.60259	381	14	376	14	400	76	376	14	0.204082
IRA1801	IRA1801_51.FIN2	367.2	4.25	0.506	0.014	0.063	0.0011	0.61956	414.8	9.4	393.8	6.5	527	47	393.8	6.5	0.235294
IRA1801	IRA1801_11.FIN2	393.8	2.162	0.498	0.012	0.06467	0.00083	0.2534	409.7	7.9	403.9	5	437	52	403.9	5	0.462535
IRA1801	IRA1801_59.FIN2	257	3.76	0.567	0.013	0.06456	0.00074	0.20814	455.2	8.8	404.2	4.8	739	57	404.2	4.8	0.265957
IRA1801	IRA1801_64.FIN2	268.5	2.474	0.486	0.016	0.0649	0.0015	0.63937	401	11	405.3	8.9	412	57	405.3	8.9	0.404204
IRA1801	IRA1801_84.FIN2	692	10.28	0.5038	0.0058	0.06516	0.00064	0.47663	414	3.9	406.9	3.9	453	23	406.9	3.9	0.0972763
IRA1801	IRA1801_119.FIN2	301	2.071	0.536	0.011	0.06717	0.00081	0.28544	434.7	7.4	419	4.9	501	45	419	4.9	0.482859
IRA1801	IRA1801_99.FIN2	452	3.62	0.529	0.011	0.06741	0.00071	0.12092	430.9	7.3	420.5	4.3	457	46	420.5	4.3	0.276243
IRA1801	IRA1801_26.FIN2	634	1.454	0.541	0.015	0.0677	0.0016	0.56819	438	10	421.9	9.9	535	58	421.9	9.9	0.687758
IRA1801	IRA1801_85.FIN2	224	1.77	0.578	0.05	0.0678	0.0044	0.7861	461	32	422	27	680	91	422	27	0.564972
IRA1801	IRA1801_131.FIN2	640	7.42	0.532	0.01	0.06834	0.00096	0.20405	432.9	7	426.1	5.8	451	49	426.1	5.8	0.134771
IRA1801	IRA1801_47.FIN2	622	4.85	0.5198	0.0098	0.06843	0.00089	0.51581	424.6	6.6	426.6	5.4	409	37	426.6	5.4	0.206186
IRA1801	IRA1801_72.FIN2	311	2.61	0.523	0.012	0.06861	0.00093	0.21612	426.9	8	427.8	5.6	427	49	427.8	5.6	0.383142
IRA1801	IRA1801_93.FIN2	318.6	5.01	0.523	0.013	0.06917	0.0009	0.21959	426.4	8.7	431.1	5.4	437	57	431.1	5.4	0.199601
IRA1801	IRA1801_39.FIN2	201.8	2.487	0.592	0.016	0.0707	0.0011	0.33018	471	10	440.1	6.8	631	56	440.1	6.8	0.402091
IRA1801	IRA1801_113.FIN2	347	7.12	0.5478	0.0085	0.07081	0.00068	0.26085	443	5.5	441	4.1	441	36	441	4.1	0.140449
IRA1801	IRA1801_73.FIN2	375	1.287	0.565	0.011	0.07122	0.00095	0.37022	454	7.3	443.5	5.7	494	44	443.5	5.7	0.777001
IRA1801	IRA1801_100.FIN2	292	5.4	0.551	0.018	0.0714	0.0011	0.30385	445	12	444.3	6.3	431	69	444.3	6.3	0.185185
IRA1801	IRA1801_71.FIN2	58.6	0.945	0.571	0.032	0.0714	0.0014	0.18173	455	20	444.5	8.6	480	110	444.5	8.6	1.0582
IRA1801	IRA1801_21.FIN2	224.3	2.195	0.562	0.018	0.0716	0.0012	0.14733	452	12	445.7	7.1	483	75	445.7	7.1	0.455581
IRA1801	IRA1801_134.FIN2	234.1	4.44	0.548	0.013	0.07172	0.00079	0.40813	442.6	8.5	446.4	4.7	391	48	446.4	4.7	0.225225
IRA1801	IRA1801_53.FIN2	446	4.239	0.553	0.012	0.0718	0.00099	0.52898	446.6	8.1	447	6	450	42	447	6	0.235905
IRA1801	IRA1801_96.FIN2	327	3.114	0.671	0.04	0.0724	0.0028	0.69248	520	25	450	17	810	93	450	17	0.32113
IRA1801	IRA1801_111.FIN2	283.6	3.05	0.564	0.013	0.07267	0.00074	0.1545	453.4	8.3	452.2	4.4	439	52	452.2	4.4	0.327869
IRA1801	IRA1801_87.FIN2	488	3.78	0.5712	0.0069	0.07279	0.00053	0.21986	458.4	4.5	452.9	3.2	472	28	452.9	3.2	0.26455
IRA1801	IRA1801_103.FIN2	164	6	0.574	0.032	0.0728	0.0014	0.14282	460	20	453.2	8.6	480	130	453.2	8.6	0.166667
IRA1801	IRA1801_65.FIN2	378	3.906	0.55	0.016	0.0729	0.001	0.42609	444	10	453.9	6.1	438	58	453.9	6.1	0.256016
IRA1801	IRA1801_13.FIN2	660	1.625	0.561	0.011	0.073	0.001	0.27486	451.6	7.1	454	6.3	439	42	454	6.3	0.615385
IRA1801	IRA1801_91.FIN2	391	1.108	0.573	0.01	0.07315	0.0007	0.41291	459.3	6.6	455	4.2	464	38	455	4.2	0.902527
IRA1801	IRA1801_44.FIN2	524	6.14	0.566	0.021	0.0734	0.0013	0.18817	454	15	456.6	7.8	463	54	456.6	7.8	0.162866
IRA1801	IRA1801_107.FIN2	293.6	4.762	0.572	0.013	0.0734	0.001	0.34522	458.7	8.4	456.8	6	454	49	456.8	6	0.209996
IRA1801	IRA1801_82.FIN2	298	1.379	0.566	0.015	0.0737	0.0012	0.43522	454.4	9.6	458.1	7.3	436	54	458.1	7.3	0.725163
IRA1801	IRA1801_60.FIN2	169.1	7.14	0.561	0.011	0.07369	0.00072	0.32658	450.8	7.4	458.3	4.3	415	44	458.3	4.3	0.140056
IRA1801	IRA1801_95.FIN2	378	2.791	0.587	0.017	0.0741	0.0015	0.50034	468	11	460.7	9.2	497	63	460.7	9.2	0.358295
IRA1801	IRA1801_15.FIN2	943	4.45	0.5717	0.009	0.07447	0.0007	0.27516	458.8	5.8	463	4.2	445	36	463	4.2	0.224719
IRA1801	IRA1801_8.FIN2	443	8.01	0.574	0.019	0.0744	0.002	0.17805	460	12	463	12	432	87	463	12	0.124844
IRA1801	IRA1801_50.FIN2	185	2.815	0.575	0.016	0.0746	0.0012	0.042449	459	10	463.5	7.4	430	58	463.5	7.4	0.35524
IRA1801	IRA1801_69.FIN2	163.3	3.14	0.566	0.011	0.0754	0.00078	0.046555	454.2	7.4	469.1	4.6	395	46	469.1	4.6	0.318471
IRA1801	IRA1801_94.FIN2	290	2.97	0.59	0.011	0.07599	0.00083	0.030694	470.1	7	472.1	5	425	46	472.1	5	0.3367
IRA1801	IRA1801_33.FIN2	238.8	2.024	0.593	0.014	0.07649	0.00091	0.14352	471.6	9.2	475.1	5.4	451	57	475.1	5.4	0.494071
IRA1801	IRA1801_110.FIN2	387	2.351	0.604	0.011	0.07654	0.00064	0.13565	479.4	7.2	475.4	3.8	486	43	475.4	3.8	0.425351
IRA1801	IRA1801_67.FIN2	282	2.45	0.582	0.011	0.07666	0.00085	0.16538	465.2	6.8	476.1	5.1	442	46	476.1	5.1	0.408163
IRA1801	IRA1801_98.FIN2	141	1.396	0.6	0.017	0.0767	0.0011	0.24464	476	11	476.2	6.3	445	63	476.2	6.3	0.716332
IRA1801	IRA1801_31.FIN2	410	3.411	0.61	0.016	0.0768	0.001	0.65035	482.5	9.7	477.1	6.1	501	51	477.1	6.1	0.293169
IRA1801	IRA1801_70.FIN2	275.8	3.04	0.608	0.015	0.0776	0.0012	0.3216	481.1	9.4	481.8	7	495	49	481.8	7	0.328947
IRA1801	IRA1801_41.FIN2	79.3	2.68	0.651	0.039	0.0781	0.0017	0.42747	507	24	485	10	590	130	485	10	0.373134
IRA1801	IRA1801_52.FIN2	259.3	1.761	0.629	0.018	0.0792	0.0016	0.70487	494	11	491.1	9.4	512	46	491.1	9.4	0.567859
IRA1801	IRA1801_58.FIN2	195.5	5.4	0.769	0.027	0.0874	0.0024	0.69294	577	16	540	14	736	55	540	14	0.185185
IRA1801	IRA1801_34.FIN2	59.2	1.595	0.714	0.025	0.0875	0.0017	0.085336	544	15	541	10	582	90	541	10	0.626959
IRA1801	IRA1801_20.FIN2	203.6	1.357	0.713	0.02	0.0901	0.0012	0.14363	545	12	555.9	6.8	497	64	555.9	6.8	0.73692
IRA1801	IRA1801_45.FIN2	776	7.35	0.776	0.014	0.0905	0.0014	0.64298	582.7	8.2	558.5	8.5	659	29	558.5	8.5	0.136054
IRA1801	IRA1801_106.FIN2	191	1.237	0.756	0.031	0.0913	0.0023	0.77927	569	18	563	14	580	58	563	14	0.808407
IRA1801	IRA1801_32.FIN2	192.2	1.779	0.745	0.023	0.0917	0.0017	0.22056	564	13	565	10	561	69	565	10	0.562114
IRA1801	IRA1801_101.FIN2	569	1.413	0.755	0.015	0.092	0.0015	0.47638	570.6	8.4	567	8.7	592	42	567	8.7	0.707714
IRA1801	IRA1801_4.FIN2	409	2.915	0.776	0.022	0.0935	0.0018	0.65859	582	12	576	11	601	48	576	11	0.343053
IRA1801	IRA1801_117.FIN2	142	3.172	0.878	0.022	0.0961	0.0014	0.31963	640	12	592.1	7.9	800	52	592.1	7.9	0.315259
IRA1801	IRA1801_17.FIN2	343	0.891	0.777	0.019	0.0965	0.0016	0.28527	583	11	594.1	9.6	554	56	594.1	9.6	1.12233
IRA1801	IRA1801_46.FIN2	473	0.3145	0.797	0.013	0.09714	0.00091	0.26126	594.7	7.2	597.6	5.4	586	34	597.6	5.4	3.17965
IRA1801	IRA1801_81.FIN2	189.1	0.655	0.826	0.016	0.098	0.0012	0.4018	610.2	8.8	602.7	6.9	638	38	602.7	6.9	1.52672
IRA1801	IRA1801_42.FIN2	443	2.61	0.868	0.014	0.0989	0.0017	0.31834	634.1	7.9	607.9	9.9	723	42	607.9	9.9	0.383142
IRA1801	IRA1801_54.FIN2	188.2	3.29	0.819	0.025	0.0993	0.002	0.50947	606	14	610	11	594	57	610	11	0.303951
IRA1801	IRA1801_122.FIN2	231.2	2.426	0.838	0.018	0.0997	0.0011	0.079638	617	10	612.6	6.4	640	51	612.6	6.4	0.412201
IRA1801	IRA1801_86.FIN2	90	0.617	0.858	0.026	0.1014	0.0015	0.22826	627	14	622.7	8.6	621	66	622.7	8.6	1.62075
IRA1801	IRA1801_120.FIN2	241.3	2.847	0.857	0.015	0.1016	0.001	0.3932	627.2	8.1	623.7	6	624	35	623.7	6	0.351247
IRA1801	IRA1801_29.FIN2	475.8	0.784	0.847	0.013	0.10228	0.00097	0.42212	622.1	7.1	627.7	5.7	600	31	627.7	5.7	1.27551
IRA1801	IRA1801_109.FIN2	79.5	0.996	0.843	0.04	0.1023	0.0021	0.20309	618	22	628	12	588	92	628	12	1.00402
IRA1801	IRA1801_22.FIN2	119.6	1.336	0.906	0.023	0.1052	0.0015	0.15397	655	12	644.5	9	676	59	644.5	9	0.748503
IRA1801	IRA1801_128.FIN2	26.71	3.02	0.879	0.041	0.1063	0.0019	0.029636	634	22	651	11	555	92	651	11	0.331126
IRA1801	IRA1801_9.FIN2	175	1.054	0.888	0.019	0.10646	0.00095	0.02273	644	10	652.1	5.6	589	52	652.1	5.6	0.948767
IRA1801	IRA1801_104.FIN2	93.8	1.716	0.901	0.034	0.1078	0.0025	0.29841	650	18	660	15	600	84	660	15	0.582751
IRA1801	IRA1801_44.FIN2	236.9	2.765	0.967	0.027	0.1104	0.0018	0.5762	686	14	675	11	721	60	675	11	0.361664
IRA1801	IRA1801_7.FIN2	304	3.16	0.947	0.024	0.1106	0.0016	0.25928	675	12	676.3	9.4	657	56	676.3	9.4	0.316456
IRA1801	IRA1801_62.FIN2	89.9	1.801	0.942	0.025	0.1108	0.0018	0.10583	672	13	677	10	680	65	677	10	0.555247
IRA1801	IRA1801_123.FIN2	315	1.303	0.926	0.015	0.11089	0.00087	0.2901	664.6	7.9	677.9	5.1	627	34	677.9	5.1	0.76746
IRA1801	IRA1801_114.FIN2	45.83	1.132	1.002	0.033	0.1118	0.0015	0.15104	703	16	683	8.8	733	70	683	8.8	0.883392
IRA1801	IRA1801_130.FIN2	237	1.434	0.986	0.037	0.1119	0.003	0.36824	696	19	684	17	739	81	684	17	0.69735
IRA1801	IRA1801_116.FIN2	188.4	44	0.971	0.024	0.114	0.002	0.38501	688	12	696	11	652	52	696	11	0.0227273
IRA1801	IRA1801_97.FIN2	165.4	0.628	1.022	0.029	0.1151	0.0016	0.1955	714	14	702.3	9.4	725	61	702.3	9.4	1.59236
IRA1801	IRA1801_38.FIN2	144.2	1.23	0.992	0.019	0.1157	0.0015	0.23076	698.3	9.6	705.8	8.5	677	45	705.8	8.5	0.813008
IRA1801	IRA1801_127.FIN2	199.7	2.226	0.993	0.017	0.1165	0.0011	0.31852	699.5	8.7	710.1	6.5	677	36	710.1	6.5	0.449236
IRA1801	IRA1801_37.FIN2	261	1.996	1.061	0.025	0.1204	0.0016	0.34707	733	12	732.8	9.3	747	50	732.8	9.3	0.501002
IRA1801	IRA1801_14.FIN2	584	1.499	1.088	0.021	0.1223	0.0025	0.75011	747	10	744	14	769	31	744	14	0.667111
IRA1801	IRA1801_129.FIN2	185.1	1.662	1.104	0.026	0.1247	0.0011	0.48269	755	13	757.7	6.3	760	47	757.7	6.3	0.601685
IRA1801	IRA1801_16.FIN2	35.3	1.244	1.144	0.086	0.1309	0.0053	0.60377	765	42	792	30	760	120	792	30	0.803859
IRA1801	IRA1801_1.FIN2	205.9	1.379	1.386	0.039	0.1343	0.0027	0.28519	881	17	812	15	1055	61	812	15	0.725163
IRA1801	IRA1801_48.FIN2	34.5	1.11	1.359	0.069	0.1463	0.0031	0.24223	866	29	880	18	820	110	820	18	0.900901
IRA1801	IRA1801_63.FIN2	158	2.572	1.247	0.019	0.1371	0.0012	0.25003	821.3	8.6	828.1	7	829	33	828.1	7	0.388802
IRA1801	IRA1801_77.FIN2	199	0.48	1.322	0.051	0.1405	0.0043	0.747	853	23	847	24	859	56	847	24	2.08333
IRA1801	IRA1801_35.FIN2	290.3	1.72	1.393	0.024	0.1471	0.0018	0.35588	885	10	885	10	897	36	897	36	0.581395
IRA1801	IRA1801_124.FIN2	196	0.249	1.526	0.023	0.1569	0.0014	0.39381	939.7	9	939.4	7.9	950	29	950	29	4.01606
IRA1801	IRA1801_95.FIN2	318	1.203	1.648	0.026	0.1648	0.0018	0.26457	988	10	983	10	974	35	974	35	0.831255
IRA1801	IRA1801_115.FIN2	91.2	0.66	1.721	0.048	0.1726	0.0029	0.13165	1014	18	1026	16	978	66	978	66	1.51515
IRA1801	IRA1801_56.FIN2	198.3	0.935	1.73	0.027	0.1724	0.0017	0.26382	1018.5	9.8	1025	9.5	1007	32	1007	32	1.06952
IRA1801	IRA1801_57.FIN2	85	0.885	1.666	0.045	0.1653	0.0023	0.33991	993	17	986	13	1027	51	1027	51	1.12994
IRA1801	IRA1801_3.FIN2	557	1.149	1.818	0.028	0.1791	0.0024	0.21674	1051	10	1062	13	1030	36	1030	36	0.870322
IRA1801	IRA1801_28.FIN2	111.1	1	1.698	0.041	0.1675	0.0025	0.086287	1006	15	998	14	1035	52	1035	52	1
IRA1801	IRA1801_89.FIN2	87.7	0.626	1.781	0.045	0.1744	0.0025	0.25644	1037	17	1036	14	1041	56	1041	56	1.59744
IRA1801	IRA1801_6.FIN2	80.2	1.605	1.884	0.034	0.1831	0.0023	0.16933	1076	12	1084	13	1045	41	1045	41	0.623053
IRA1801	IRA1801_132.FIN2	341	1.472	1.586	0.031	0.1529	0.0025	0.69006	963	12	917	14	1059	29	1059	29	0.679348
IRA1801	IRA1801_43.FIN2	511	1.328	1.842	0.023	0.1767	0.0021	0.69101	1060	8.1	1051	12	1077	20	1077	20	0.753012
IRA1801	IRA1801_105.FIN2	152.4	0.7783	2.046	0.034	0.1927	0.0019	0.41276	1130	11	1136	10	1107	31	1107	31	1.28485
IRA1801	IRA1801_90.FIN2	70.6	1.526	1.661	0.039	0.1565	0.0023	0.4674	991	15	937	13	1123	49	1123	49	0.655308
IRA1801	IRA1801_118.FIN2	590	0.685	4.082	0.052	0.2858	0.0028	0.62341	1649	10	1620	14	1678	18	1678	18	1.45985
IRA1801	IRA1801_24.FIN2	1397	2.852	3.777	0.055	0.2482	0.004	0.74745	1587	12	1429	21	1814	20	1814	20	0.350631
IRA1801	IRA1801_83.FIN2	196.8	1.014	5.45	0.049	0.3474	0.0026	0.49289	1892	7.7	1922	12	1859	14	1859	14	0.986193
IRA1801	IRA1801_10.FIN2	164.1	2.107	5.841	0.063	0.3541	0.0032	0.43579	1951.5	9.3	1954	15	1942	19	1942	19	0.474608
IRA1801	IRA1801_133.FIN2	405.9	6.1	5.23	0.26	0.31	0.011	0.94733	1857	44	1738	57	1990	32	1990	32	0.163934
IRA1801	IRA1801_8.FIN2	643	1.098	5.144	0.089	0.3007	0.0059	0.67113	1843	15	1694	29	2002	26	2002	26	0.910747
IRA1801	IRA1801_135.FIN2	249	1.357	4.53	0.13	0.2632	0.0066	0.75554	1732	23	1505	33	2006	26	2006	26	0.73692
IRA1801	IRA1801_79.FIN2	274	1.533	7.01	0.068	0.3904	0.0036	0.70577	2111.6	8.6	2124	17	2092	13	2092	13	0.652316
IRA1801	IRA1801_112.FIN2	330	2.546	7.549	0.079	0.4178	0.0045	0.66532	2178.2	9.4	2250	20	2105	16	2105	16	0.392773
IRA1801	IRA1801_25.FIN2	523	6.08	7.377	0.072	0.4025	0.0032	0.66403	2157.5	8.7	2180	15	2141	13	2141	13	0.164474
IRA1801	IRA1801_30.FIN2	508	2.029	8.439	0.076	0.4239	0.0044	0.58206	2278.7	8.2	2278	20	2279	16	2279	16	0.492854
IRA1801	IRA1801_121.FIN2	218.1	2.37	8.16	0.11	0.3862	0.0041	0.45965	2247	12	2104	19	2381	23	2381	23	0.421941
IRA1801	IRA1801_80.FIN2	947	2.99	11.25	0.13	0.4735	0.0056	0.79534	2543	11	2498	24	2564	14	2564	14	0.334448
IRA1801	IRA1801_102.FIN2	248	0.821	10.59	0.2	0.4464	0.0069	0.88898	2484	19	2377	31	2570	15	2570	15	1.21803
IRA1801	IRA1801_40.FIN2	155.4	1.682	10.95	0.19	0.4641	0.0073	0.70208	2517	16	2457	32	2580	21	2580	21	0.59453
IRA1801	IRA1801_2.FIN2	51.38	1	11.81	0.16	0.4951	0.0054	0.32393	2587	13	2592	23	2586	24	2586	24	1
IRA1801	IRA1801_61.FIN2	221	0.529	11.07	0.24	0.468	0.011	0.82118	2528	20	2475	47	2596	24	2596	24	1.89036
IRA1801	IRA1801_36.FIN2	97.6	0.764	11.62	0.22	0.4785	0.0071	0.64317	2573	17	2520	31	2627	24	2627	24	1.3089
IRA1801	IRA1801_92.FIN2	205.5	2.914	13.02	0.1	0.4571	0.0036	0.56484	2680.8	7.6	2426	16	2863	12	2863	12	0.343171
IRA1802	IRA1802_95.FIN2	3780	76.7	0.053	0.0022	0.00783	0.00038	0.63625	52.4	2.1	50.3	2.4	185	83	50.3	2.4	0.0130378	rim
IRA1802	IRA1802_78.FIN2	3350	77	0.0552	0.002	0.00784	0.00026	0.56501	54.5	2	50.4	1.6	264	75	50.4	1.6	0.012987	rim
IRA1802	IRA1802_80.FIN2	2780	48.3	0.0582	0.0032	0.00804	0.00033	0.68619	57.4	3	51.6	2.1	299	87	51.6	2.1	0.0207039	rim
IRA1802	IRA1802_2.FIN2	1894	15	0.068	0.0052	0.00909	0.00033	0.69069	66.7	4.9	58.3	2.1	360	110	58.3	2.1	0.0666667	rim
IRA1802	IRA1802_130.FIN2	2780	13.2	0.0657	0.0022	0.00947	0.00032	0.82037	64.6	2.1	60.8	2	216	55	60.8	2	0.0757576	rim
IRA1802	IRA1802_42.FIN2	4140	43.9	0.0701	0.0047	0.01015	0.0007	0.78201	68.7	4.5	65.1	4.5	215	93	65.1	4.5	0.022779	rim
IRA1802	IRA1802_79.FIN2	2310	20.4	0.0704	0.0062	0.01034	0.00078	0.8591	68.9	5.9	66.3	5	120	74	66.3	5	0.0490196	rim
IRA1802	IRA1802_47.FIN2	1150	27.7	0.093	0.014	0.01197	0.00093	0.59993	90	13	76.7	5.9	400	240	76.7	5.9	0.0361011	rim
IRA1802	IRA1802_17.FIN2	3240	11.7	0.0977	0.0069	0.01287	0.00067	0.72206	94.6	6.4	82.5	4.2	410	110	82.5	4.2	0.0854701	rim
IRA1802	IRA1802_100.FIN2	2620	49.5	0.1078	0.0068	0.01391	0.00063	0.74351	103.8	6.2	89	4	440	100	89	4	0.020202	rim
IRA1802	IRA1802_50.FIN2	1721	14.6	0.11	0.004	0.01485	0.00053	0.56257	105.9	3.6	95	3.3	357	74	95	3.3	0.0684932	rim
IRA1802	IRA1802_2.FIN2	271.4	1.562	0.233	0.013	0.03168	0.00083	0.18029	212	10	201.1	5.2	300	120	201.1	5.2	0.640205
IRA1802	IRA1802_78.FIN2	289	1.57	0.222	0.017	0.0321	0.0012	0.52934	202	14	203.8	7.5	190	140	203.8	7.5	0.636943
IRA1802	IRA1802_21.FIN2	517	2.508	0.247	0.015	0.0324	0.0025	0.40278	224	12	206	16	440	170	206	16	0.398724
IRA1802	IRA1802_38.FIN2	1030	1.385	0.2347	0.0066	0.03273	0.00068	0.36128	213.9	5.4	207.6	4.2	265	60	207.6	4.2	0.722022
IRA1802	IRA1802_28.FIN2	1069	1.65	0.235	0.01	0.0337	0.001	0.83976	213.7	8.3	213.4	6.3	200	52	213.4	6.3	0.606061
IRA1802	IRA1802_13.FIN2	276.3	1.175	0.25	0.017	0.0348	0.0015	0.53036	225	14	220.7	9.2	280	120	220.7	9.2	0.851064
IRA1802	IRA1802_31.FIN2	1103	10.46	0.262	0.011	0.0349	0.0011	0.80268	235.8	8.8	221	6.9	340	56	221	6.9	0.0956023
IRA1802	IRA1802_55.FIN2	523	1.115	0.2602	0.0068	0.03628	0.00045	0.090204	234.6	5.4	229.7	2.8	277	60	229.7	2.8	0.896861
IRA1802	IRA1802_9.FIN2	569	1.693	0.2584	0.0083	0.03676	0.00055	0.19243	233.1	6.7	232.7	3.4	246	70	232.7	3.4	0.590667
IRA1802	IRA1802_70.FIN2	492	0.858	0.2638	0.0079	0.03695	0.00054	0.52129	237.4	6.3	233.9	3.3	281	67	233.9	3.3	1.1655
IRA1802	IRA1802_79.FIN2	412	0.797	0.2671	0.0087	0.03768	0.00051	0.072768	240	6.9	238.4	3.2	267	74	238.4	3.2	1.25471
IRA1802	IRA1802_98.FIN2	110.1	1.783	0.282	0.012	0.03789	0.00071	0.27692	251.2	9.8	239.7	4.4	345	89	239.7	4.4	0.560852
IRA1802	IRA1802_33.FIN2	383.9	1.085	0.2704	0.0084	0.03805	0.00061	0.39465	242.6	6.8	240.7	3.8	229	63	240.7	3.8	0.921659
IRA1802	IRA1802_105.FIN2	1053	0.566	0.271	0.006	0.03808	0.00052	0.45316	243.4	4.8	240.9	3.2	254	47	240.9	3.2	1.76678
IRA1802	IRA1802_64.FIN2	400	1.116	0.2733	0.0071	0.03849	0.00069	0.60332	244.9	5.6	243.4	4.3	250	45	243.4	4.3	0.896057
IRA1802	IRA1802_97.FIN2	227.5	1.153	0.2745	0.0078	0.03938	0.00049	0.014954	245.8	6.2	249	3	218	64	249	3	0.867303
IRA1802	IRA1802_110.FIN2	308	1.12	0.2887	0.0095	0.03965	0.0007	0.10783	257.2	7.5	250.6	4.3	309	83	250.6	4.3	0.892857
IRA1802	IRA1802_66.FIN2	461	1.852	0.2715	0.0083	0.03989	0.0006	0.63801	244.9	6.2	252.1	3.7	201	55	252.1	3.7	0.539957
IRA1802	IRA1802_117.FIN2	841	0.846	0.2891	0.0072	0.0403	0.00068	0.0078297	257.8	5.6	254.7	4.2	294	68	254.7	4.2	1.18203
IRA1802	IRA1802_40.FIN2	606	1.007	0.2947	0.0065	0.04111	0.00051	0.4715	262	5.1	259.7	3.2	272	44	259.7	3.2	0.993049
IRA1802	IRA1802_8.FIN2	521.1	0.855	0.2998	0.0061	0.04112	0.00041	0.16029	266	4.7	259.7	2.5	328	46	259.7	2.5	1.16959
IRA1802	IRA1802_7.FIN2	597	0.582	0.2948	0.006	0.04166	0.00039	0.1001	262.1	4.7	263.1	2.4	261	48	263.1	2.4	1.71821
IRA1802	IRA1802_68.FIN2	210.3	0.916	0.32	0.012	0.04196	0.00086	0.34992	281.6	9.4	264.9	5.3	429	82	264.9	5.3	1.0917
IRA1802	IRA1802_72.FIN2	218	1.01	0.308	0.011	0.04243	0.00087	0.21431	272.2	8.4	267.8	5.3	317	80	267.8	5.3	0.990099
IRA1802	IRA1802_118.FIN2	465	1.906	0.3535	0.0096	0.04567	0.00082	0.42596	307	7.1	287.9	5.1	465	59	287.9	5.1	0.524659
IRA1802	IRA1802_104.FIN2	280.7	7.48	0.399	0.016	0.0473	0.0011	0.59259	340	12	298.1	6.9	605	73	298.1	6.9	0.13369
IRA1802	IRA1802_49.FIN2	1524	2.392	0.3627	0.0077	0.04812	0.00071	0.37178	314.1	5.8	303	4.3	404	47	303	4.3	0.41806
IRA1802	IRA1802_45.FIN2	822	1.45	0.496	0.019	0.0553	0.0016	0.77362	407	13	347.1	9.5	745	50	347.1	9.5	0.689655
IRA1802	IRA1802_116.FIN2	1188	6.27	0.51	0.013	0.0614	0.0015	0.74167	417.9	8.9	384.3	9.4	621	39	384.3	9.4	0.15949
IRA1802	IRA1802_32.FIN2	115.2	1.198	0.54	0.033	0.063	0.0017	0.40231	437	21	394	10	640	120	394	10	0.834725
IRA1802	IRA1802_26.FIN2	1166	2.161	0.509	0.013	0.0631	0.0021	0.53914	417.5	8.7	395	13	564	66	395	13	0.462749
IRA1802	IRA1802_27.FIN2	1057	1.262	0.503	0.01	0.06526	0.0009	0.52152	413.5	6.8	407.5	5.4	442	34	407.5	5.4	0.792393
IRA1802	IRA1802_58.FIN2	581	2.34	0.52	0.014	0.0669	0.0013	0.444	425	9.4	417.7	8	445	66	417.7	8	0.42735
IRA1802	IRA1802_101.FIN2	341.5	2.024	0.542	0.018	0.0683	0.0018	0.39411	439	12	426	11	500	72	426	11	0.494071
IRA1802	IRA1802_41.FIN2	654	1.308	0.548	0.011	0.06953	0.00097	0.33045	443.2	7	433.3	5.9	505	46	433.3	5.9	0.764526
IRA1802	IRA1802_37.FIN2	463	2.789	0.538	0.013	0.0697	0.0012	0.40804	436.5	8.4	434.5	7.2	418	51	434.5	7.2	0.358551
IRA1802	IRA1802_4.FIN2	732	4.36	0.554	0.01	0.07052	0.00077	0.48098	447.3	6.7	439.3	4.6	481	36	439.3	4.6	0.229358
IRA1802	IRA1802_102.FIN2	199	1.667	0.542	0.015	0.0707	0.0012	0.34725	438.6	9.7	440.1	7.3	413	59	440.1	7.3	0.59988
IRA1802	IRA1802_121.FIN2	332.9	1.349	0.552	0.012	0.07108	0.00083	0.38151	445.6	7.7	442.6	5	436	45	442.6	5	0.74129
IRA1802	IRA1802_10.FIN2	263	1.261	0.592	0.021	0.0711	0.0021	0.5039	471	14	443	13	651	77	443	13	0.793021
IRA1802	IRA1802_71.FIN2	299	1.694	0.546	0.01	0.07126	0.00071	0.40663	442	6.5	443.7	4.3	431	34	443.7	4.3	0.590319
IRA1802	IRA1802_34.FIN2	382	4.55	0.5607	0.0096	0.07136	0.00078	0.3889	451.5	6.3	444.3	4.7	451	37	444.3	4.7	0.21978
IRA1802	IRA1802_53.FIN2	257.6	1.364	0.544	0.015	0.07152	0.00085	0.40059	440	10	445.2	5.1	406	57	445.2	5.1	0.733138
IRA1802	IRA1802_50.FIN2	350	1.408	0.567	0.016	0.07296	0.00099	0.30296	455	10	453.9	5.9	465	61	453.9	5.9	0.710227
IRA1802	IRA1802_84.FIN2	351	1.613	0.5604	0.0089	0.07345	0.00068	0.17535	451.3	5.8	456.9	4.1	421	38	456.9	4.1	0.619963
IRA1802	IRA1802_88.FIN2	475	5.79	0.5658	0.0091	0.07418	0.00073	0.24649	454.8	5.9	461.3	4.4	422	37	461.3	4.4	0.172712
IRA1802	IRA1802_23.FIN2	504.7	1.213	0.605	0.02	0.0744	0.0018	0.45001	480	13	463	11	582	69	463	11	0.824402
IRA1802	IRA1802_127.FIN2	475	3.99	0.5764	0.0081	0.07471	0.00082	0.45	461.8	5.2	464.4	4.9	450	31	464.4	4.9	0.250627
IRA1802	IRA1802_85.FIN2	276.1	1.536	0.591	0.024	0.0748	0.0013	0.17483	471	15	464.9	7.6	504	92	464.9	7.6	0.651042
IRA1802	IRA1802_39.FIN2	613	1.345	0.584	0.01	0.07506	0.00075	0.10899	466.7	6.6	466.5	4.5	456	43	466.5	4.5	0.743494
IRA1802	IRA1802_54.FIN2	563	4.774	0.587	0.01	0.07647	0.00088	0.46143	469.8	6.2	475	5.3	443	37	475	5.3	0.209468
IRA1802	IRA1802_57.FIN2	313.4	2.088	0.589	0.011	0.07704	0.00092	0.329	469.9	7	478.4	5.5	429	41	478.4	5.5	0.478927
IRA1802	IRA1802_90.FIN2	217	2.8	0.591	0.013	0.0778	0.001	0.40501	471	8	482.6	6.1	410	41	482.6	6.1	0.357143
IRA1802	IRA1802_20.FIN2	296	5.9	0.611	0.011	0.07808	0.0009	0.32255	483.3	7	484.6	5.4	477	41	484.6	5.4	0.169492
IRA1802	IRA1802_119.FIN2	254.5	2.184	0.604	0.016	0.0781	0.0014	0.21767	479	10	484.8	8.2	434	65	484.8	8.2	0.457875
IRA1802	IRA1802_75.FIN2	407.9	1.858	0.621	0.0097	0.07977	0.00074	0.2165	490.1	6	494.7	4.4	472	36	494.7	4.4	0.538213
IRA1802	IRA1802_128.FIN2	531	1.369	0.732	0.031	0.0836	0.0018	0.25774	557	17	518	11	715	63	518	11	0.73046
IRA1802	IRA1802_124.FIN2	210	1.064	0.697	0.019	0.0848	0.0013	0.2613	536	11	524.5	7.9	563	60	524.5	7.9	0.93985
IRA1802	IRA1802_47.FIN2	84.3	2.059	0.718	0.035	0.0873	0.0021	0.29182	546	20	540	12	558	99	540	12	0.485673
IRA1802	IRA1802_95.FIN2	74.6	1.52	0.726	0.063	0.0886	0.0057	0.79344	553	35	546	34	590	100	546	34	0.657895
IRA1802	IRA1802_36.FIN2	410	1.915	0.722	0.021	0.089	0.0021	0.38892	551	12	549	13	539	65	549	13	0.522193
IRA1802	IRA1802_35.FIN2	406	2.384	0.766	0.017	0.092	0.0013	0.40756	576.5	9.6	567.2	7.9	582	45	567.2	7.9	0.419463
IRA1802	IRA1802_104.FIN2	96	3.11	0.789	0.066	0.0926	0.0036	0.75821	587	36	571	21	620	120	571	21	0.321543
IRA1802	IRA1802_91.FIN2	652	109	0.752	0.01	0.0928	0.00096	0.63439	568.8	5.9	572	5.7	563	24	572	5.7	0.00917431
IRA1802	IRA1802_114.FIN2	1066	13.8	0.787	0.015	0.0929	0.0015	0.68109	588.9	8.6	572.8	8.8	661	32	572.8	8.8	0.0724638
IRA1802	IRA1802_111.FIN2	117.1	2.35	0.885	0.044	0.0955	0.0032	0.7304	641	24	588	19	825	68	588	19	0.425532
IRA1802	IRA1802_81.FIN2	228.3	1.745	0.796	0.018	0.0973	0.0015	0.45998	595	10	598.5	8.9	586	45	598.5	8.9	0.573066
IRA1802	IRA1802_63.FIN2	237	0.858	0.822	0.012	0.0995	0.001	0.46946	609.2	7.2	611.1	6.2	604	31	611.1	6.2	1.1655
IRA1802	IRA1802_44.FIN2	483	2.16	0.911	0.029	0.0996	0.0025	0.77676	656	15	612	15	805	38	612	15	0.462963
IRA1802	IRA1802_123.FIN2	641	1.638	0.849	0.013	0.10125	0.00099	0.58606	623.9	7.4	621.7	5.8	612	28	621.7	5.8	0.610501
IRA1802	IRA1802_17.FIN2	126.7	1.646	0.84	0.023	0.1013	0.0016	0.42668	617	13	622.1	9.3	595	62	622.1	9.3	0.607533
IRA1802	IRA1802_108.FIN2	315	5.86	0.88	0.019	0.1026	0.0013	0.41572	640	10	629.7	7.8	666	45	629.7	7.8	0.170648
IRA1802	IRA1802_99.FIN2	367.4	3.29	0.93	0.026	0.1038	0.0023	0.83368	666	14	637	14	765	33	637	14	0.303951
IRA1802	IRA1802_87.FIN2	205.4	1.112	0.935	0.037	0.105	0.0013	0.65634	666	17	643.5	7.7	726	56	643.5	7.7	0.899281
IRA1802	IRA1802_125.FIN2	277	2.278	0.918	0.024	0.1072	0.0021	0.6033	661	13	656	12	673	43	656	12	0.438982
IRA1802	IRA1802_14.FIN2	509	1.143	0.968	0.069	0.1075	0.0023	0.52039	680	29	658	14	800	98	658	14	0.874891
IRA1802	IRA1802_46.FIN2	480	3.24	1.021	0.021	0.1111	0.0024	0.37223	714	10	679	14	842	51	679	14	0.308642
IRA1802	IRA1802_96.FIN2	224	2.27	1.168	0.095	0.1134	0.0084	0.95884	780	46	692	49	1059	43	692	49	0.440529
IRA1802	IRA1802_120.FIN2	437.4	1.269	0.969	0.011	0.11402	0.0009	0.30769	687.7	5.7	696	5.2	647	25	696	5.2	0.788022
IRA1802	IRA1802_69.FIN2	174.4	2.45	0.943	0.014	0.1142	0.0012	0.41865	674	7.5	697.3	7.2	617	34	697.3	7.2	0.408163
IRA1802	IRA1802_12.FIN2	270	2.082	1.158	0.057	0.1178	0.007	0.68574	779	27	718	40	975	89	718	40	0.480307
IRA1802	IRA1802_89.FIN2	831	3.479	1.013	0.013	0.118	0.0014	0.52905	709.7	6.5	719.1	8.1	690	26	719.1	8.1	0.287439
IRA1802	IRA1802_93.FIN2	416	4.3	1.079	0.017	0.1199	0.0016	0.43107	742.7	8.4	729.6	9.4	794	33	729.6	9.4	0.232558
IRA1802	IRA1802_62.FIN2	127	0.897	1.051	0.024	0.1215	0.0017	0.3002	728	12	739.3	9.8	688	49	739.3	9.8	1.11483
IRA1802	IRA1802_30.FIN2	488	2.36	1.199	0.033	0.1266	0.003	0.65413	799	15	768	17	880	45	768	17	0.423729
IRA1802	IRA1802_22.FIN2	286	1.48	1.148	0.031	0.1273	0.0024	0.43507	776	15	772	14	804	53	772	14	0.675676
IRA1802	IRA1802_56.FIN2	569	1.685	1.301	0.015	0.1439	0.0011	0.36252	846	6.4	866.7	6	803	21	803	6	0.593472
IRA1802	IRA1802_94.FIN2	222	0.5528	1.301	0.029	0.133	0.0025	0.65391	844	13	805	14	961	36	805	14	1.80897
IRA1802	IRA1802_103.FIN2	565	0.753	1.246	0.018	0.1343	0.0016	0.58712	821.2	8.2	812.3	9	836	26	812.3	9	1.32802
IRA1802	IRA1802_106.FIN2	378	0.584	1.222	0.026	0.1346	0.0025	0.60238	810	12	814	14	797	40	814	14	1.71233
IRA1802	IRA1802_25.FIN2	496	1.644	1.32	0.024	0.1435	0.0022	0.52891	854	10	864	12	840	34	840	12	0.608273
IRA1802	IRA1802_80.FIN2	90.5	1.482	1.346	0.034	0.142	0.002	0.27268	864	15	856	11	904	54	904	54	0.674764
IRA1802	IRA1802_86.FIN2	101.3	1.717	1.428	0.029	0.1488	0.0015	0.10775	899	12	894.3	8.6	917	43	917	43	0.582411
IRA1802	IRA1802_126.FIN2	104.5	1.494	1.724	0.037	0.1724	0.0018	0.31832	1016	14	1025	9.7	987	42	987	42	0.669344
IRA1802	IRA1802_11.FIN2	242.4	0.884	1.609	0.028	0.1631	0.0024	0.49693	973	11	974	13	996	34	996	34	1.13122
IRA1802	IRA1802_100.FIN2	243.4	2.86	1.617	0.061	0.1612	0.0057	0.90655	973	22	962	31	1000	41	1000	41	0.34965
IRA1802	IRA1802_59.FIN2	143	1.01	1.783	0.053	0.1785	0.0033	0.64407	1037	19	1059	18	1002	47	1002	47	0.990099
IRA1802	IRA1802_122.FIN2	175.2	1.479	1.645	0.058	0.1615	0.0036	0.70796	985	22	965	20	1015	52	1015	52	0.676133
IRA1802	IRA1802_60.FIN2	185.8	4.99	1.778	0.041	0.1758	0.0027	0.59753	1036	15	1044	15	1040	39	1040	39	0.200401
IRA1802	IRA1802_74.FIN2	114.3	0.967	1.592	0.046	0.1563	0.0026	0.39443	968	17	936	15	1048	52	1048	52	1.03413
IRA1802	IRA1802_115.FIN2	265.1	0.835	1.666	0.041	0.163	0.0032	0.41216	995	16	973	17	1060	49	1060	49	1.1976
IRA1802	IRA1802_129.FIN2	535	1.739	1.795	0.035	0.1687	0.0026	0.63572	1041	13	1007	14	1119	30	1119	30	0.575043
IRA1802	IRA1802_29.FIN2	505	1.924	1.991	0.046	0.1859	0.0038	0.65202	1112	15	1099	21	1138	36	1138	36	0.519751
IRA1802	IRA1802_65.FIN2	235.5	3.67	2.882	0.085	0.2448	0.0044	0.56836	1376	22	1412	23	1332	50	1332	50	0.27248
IRA1802	IRA1802_15.FIN2	58.2	2.032	2.472	0.088	0.2058	0.0078	0.2797	1260	25	1205	42	1371	85	1371	85	0.492126
IRA1802	IRA1802_112.FIN2	202	0.949	4.57	0.1	0.2924	0.0059	0.85346	1741	18	1653	30	1850	22	1850	22	1.05374
IRA1802	IRA1802_3.FIN2	306.6	0.7144	5.14	0.051	0.3258	0.0028	0.62756	1842	8.4	1818	14	1866	14	1866	14	1.39978
IRA1802	IRA1802_18.FIN2	256.8	0.701	5.407	0.075	0.3395	0.004	0.92418	1885	12	1884	19	1901	18	1901	18	1.42653
IRA1802	IRA1802_61.FIN2	162	0.816	5.37	0.14	0.3345	0.0071	0.80846	1878	22	1860	34	1911	26	1911	26	1.22549
IRA1802	IRA1802_109.FIN2	197	0.775	6.42	0.54	0.379	0.034	0.94319	2031	72	2070	160	1997	52	1997	52	1.29032
IRA1802	IRA1802_19.FIN2	319.7	3.18	9.96	0.15	0.4554	0.0057	0.68832	2429	14	2418	25	2442	23	2442	23	0.314465
IRA1802	IRA1802_92.FIN2	329	1.74	10.48	0.34	0.477	0.015	0.91311	2476	30	2512	66	2454	23	2454	23	0.574713
